# Supplementary material for: Efficient enantioselective fluorination of β-keto esters/amides catalysed by diphenylamine-linked bis(thiazoline)–Cu(OTf)2complexes
Source: Royal Society of Chemistry journal article supplement (doi:10.1039/c3ra45438j), 2013-11-11
Supplement: c3ra45438j.pdf [file c3ra45438j.pdf]

# Efficient enantioselective fluorination of $\beta$ -keto esters/amides catalysed by diphenylamine-linked bis(thiazoline)-Cu(OTf)<sub>2</sub> complexes

Jiahuan Peng and Da-Ming Du\*

*School of Chemical Engineering and Environment, Beijing Institute of Technology,  
Beijing 100081, People's Republic of China*

[dudm@bit.edu.cn](mailto:dudm@bit.edu.cn)

## *Supporting Information*

### **Contents**

|                                                                                |     |
|--------------------------------------------------------------------------------|-----|
| Copies of <sup>1</sup> H and <sup>13</sup> C NMR spectra of new compounds..... | S1  |
| Copies of HPLC chromatographs.....                                             | S16 |

### Copies of $^1\text{H}$ and $^{13}\text{C}$ NMR spectra of new compounds

#### 2-((*S*)-4,5-dihydro-4-phenylthiazol-2-yl)-*N*-(2-((*S*)-4,5-dihydro-4-phenylthiazol-2-yl)phenyl)-*N*-phenylbenzenamine (**X**)

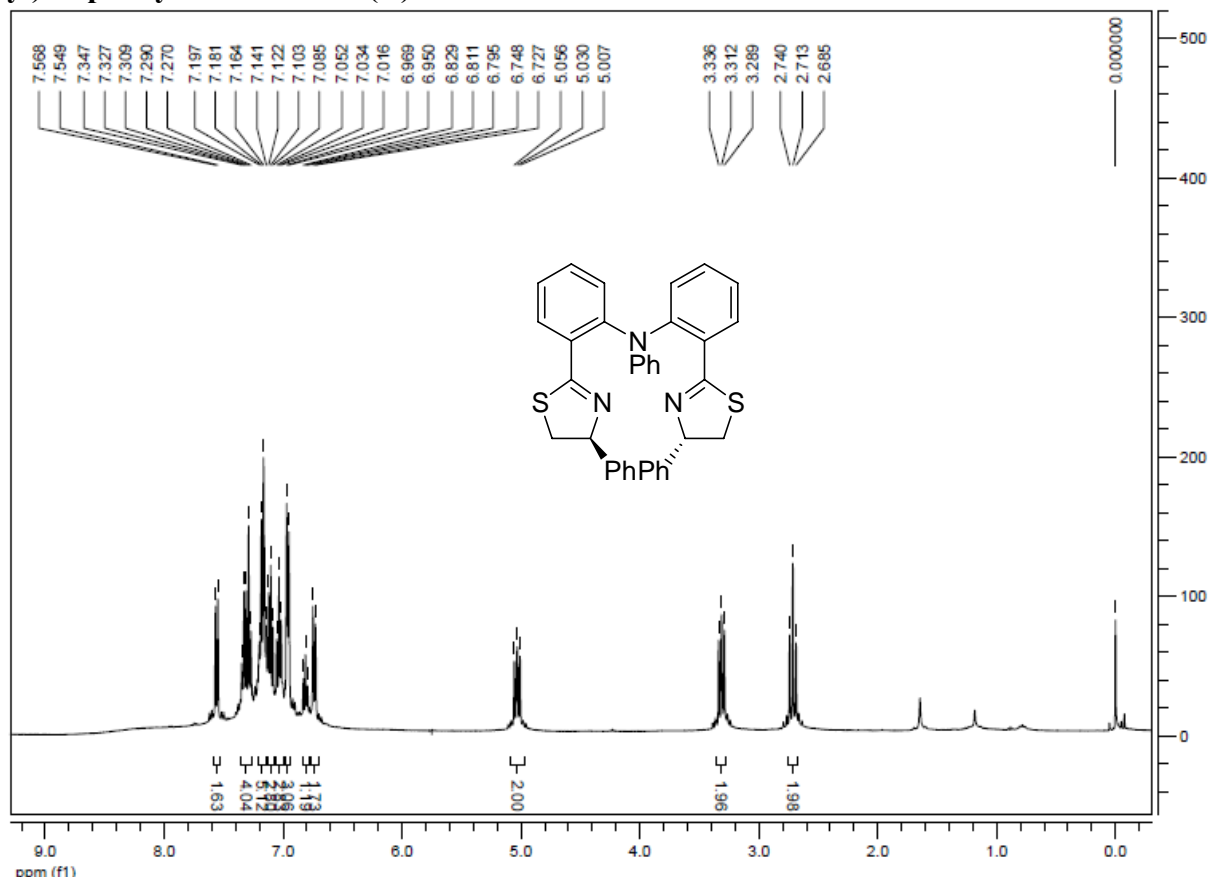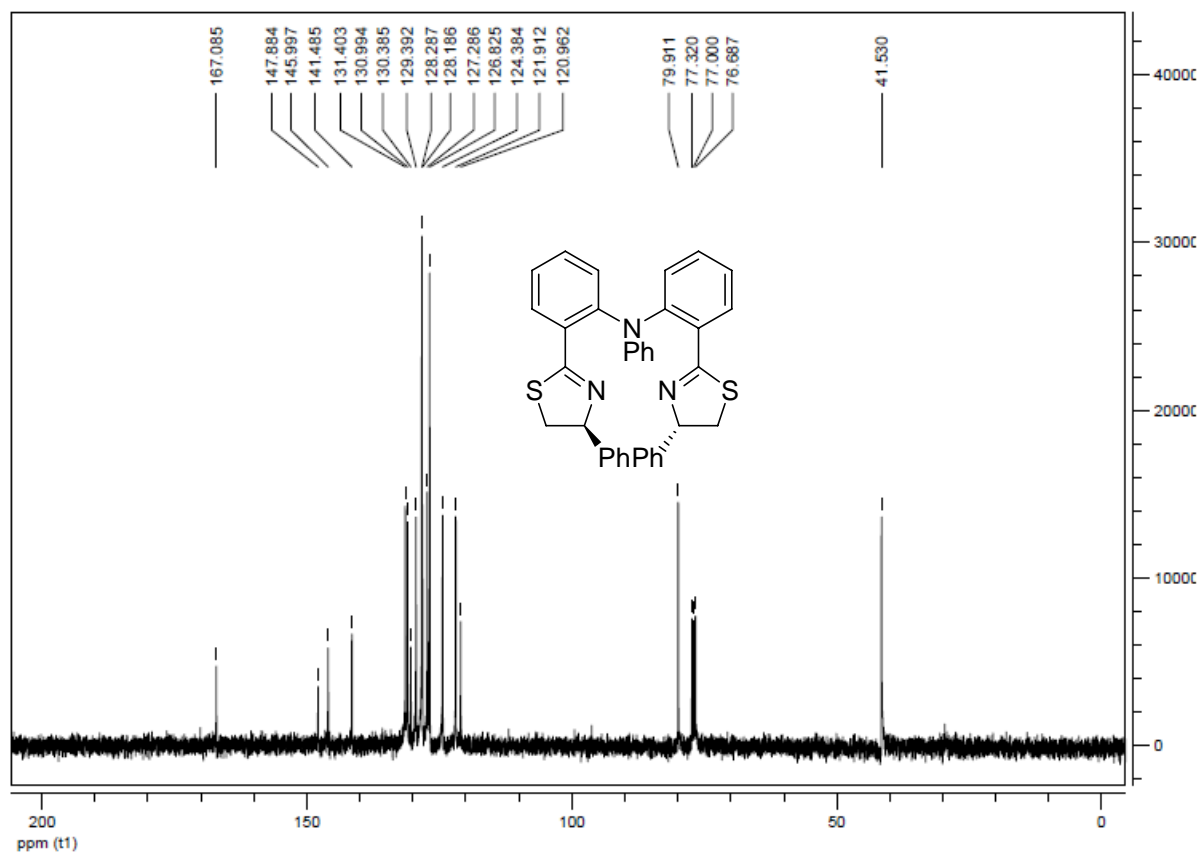

### Ethyl 2-fluoro-2,3-dihydro-1-oxo-1*H*-indene-2-carboxylate (2a)

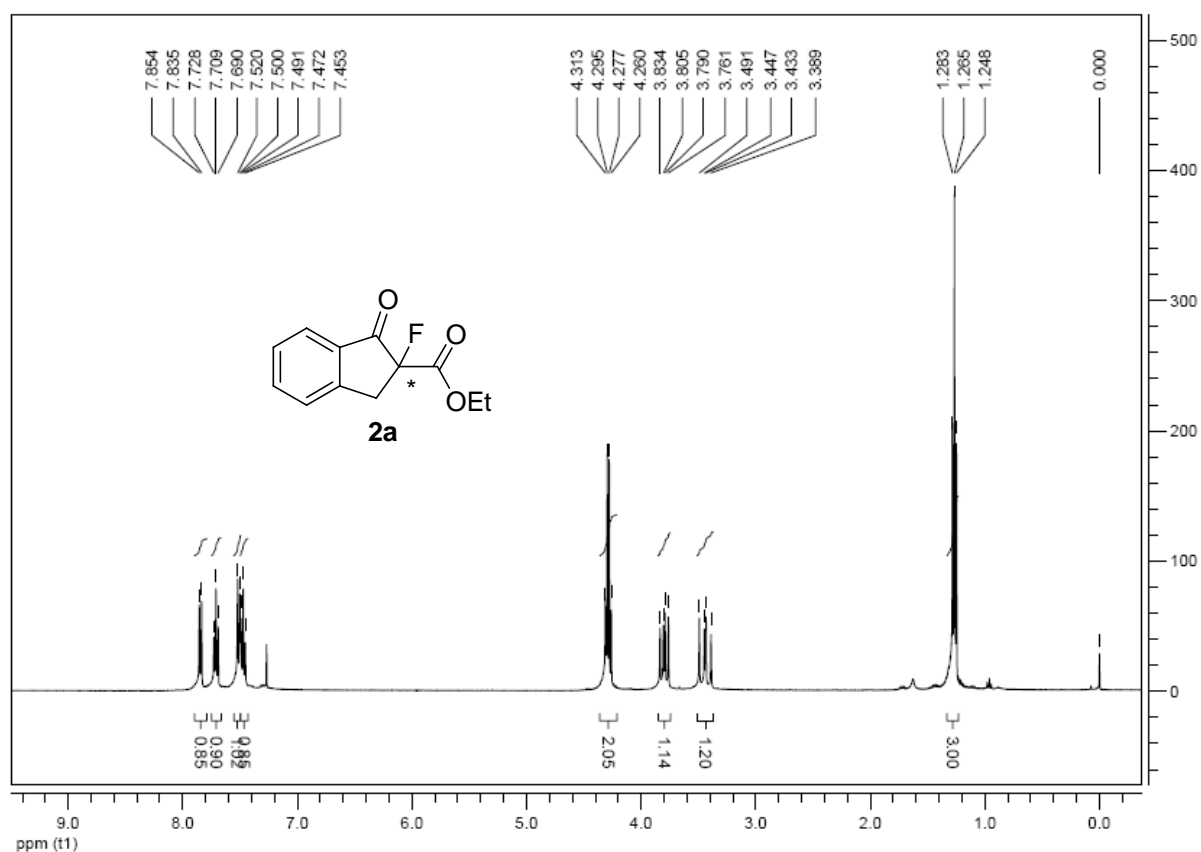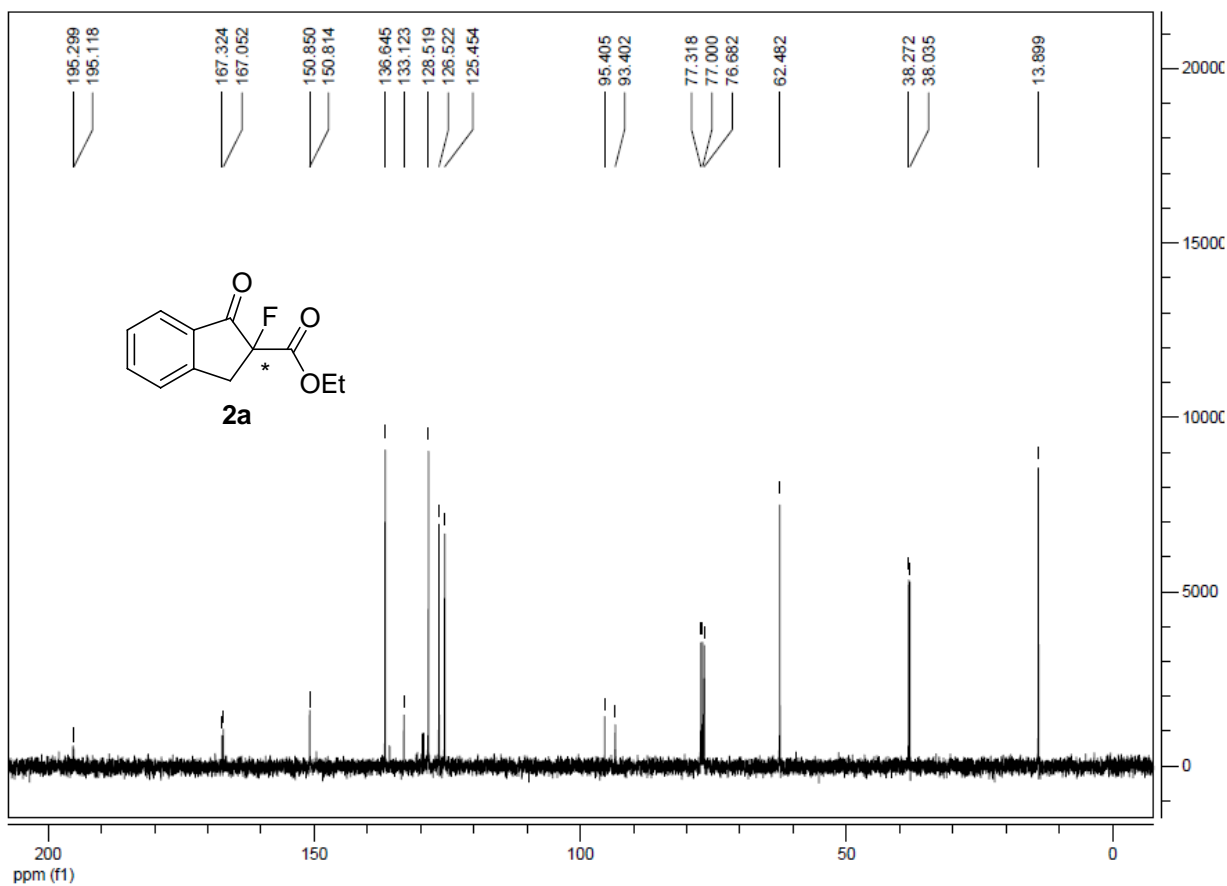

### Ethyl 2-fluoro-1,2,3,4-tetrahydro-1-oxonaphthalene-2-carboxylate (**2b**)

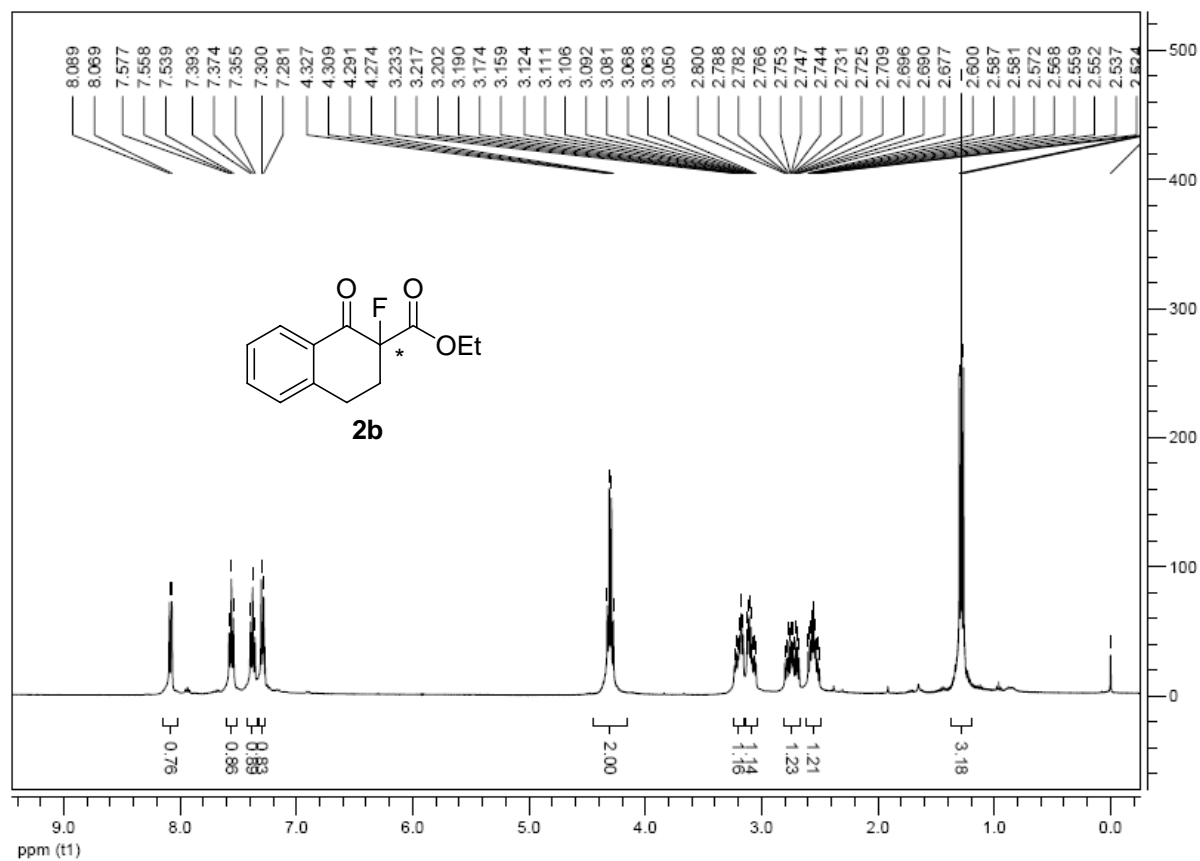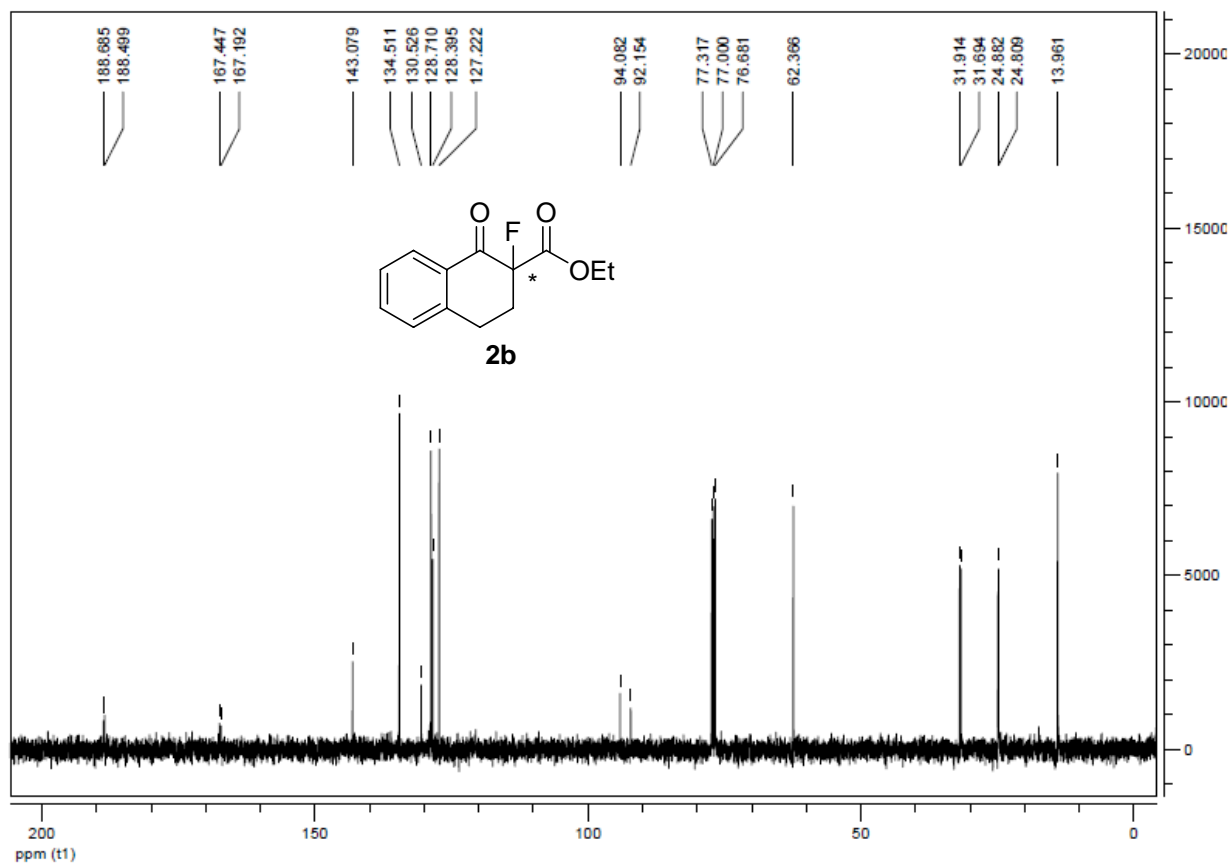

### Benzyl 2-fluoro-1,2,3,4-tetrahydro-1-oxonaphthalene-2-carboxylate (2c)

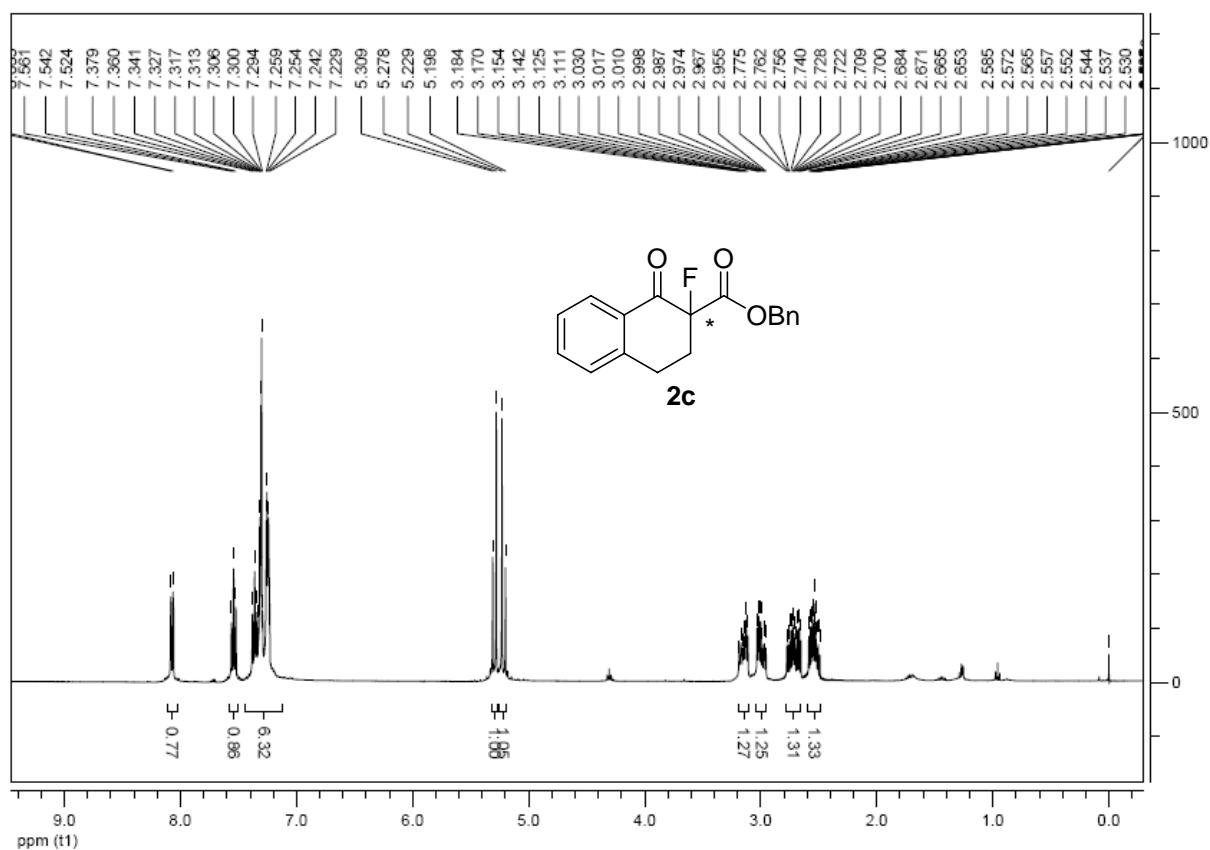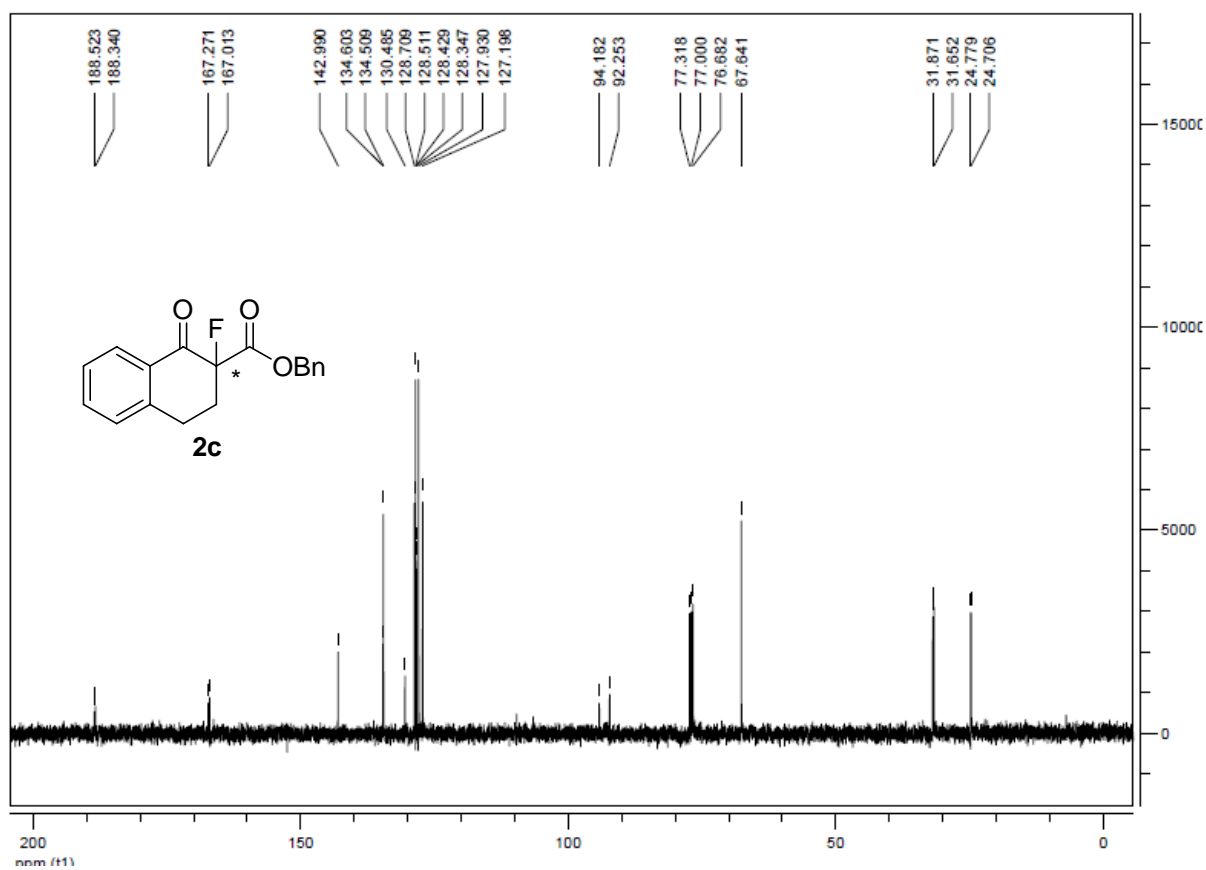

### Methyl 2-fluoro-1,2,3,4-tetrahydro-1-oxonaphthalene-2-carboxylate (2d)

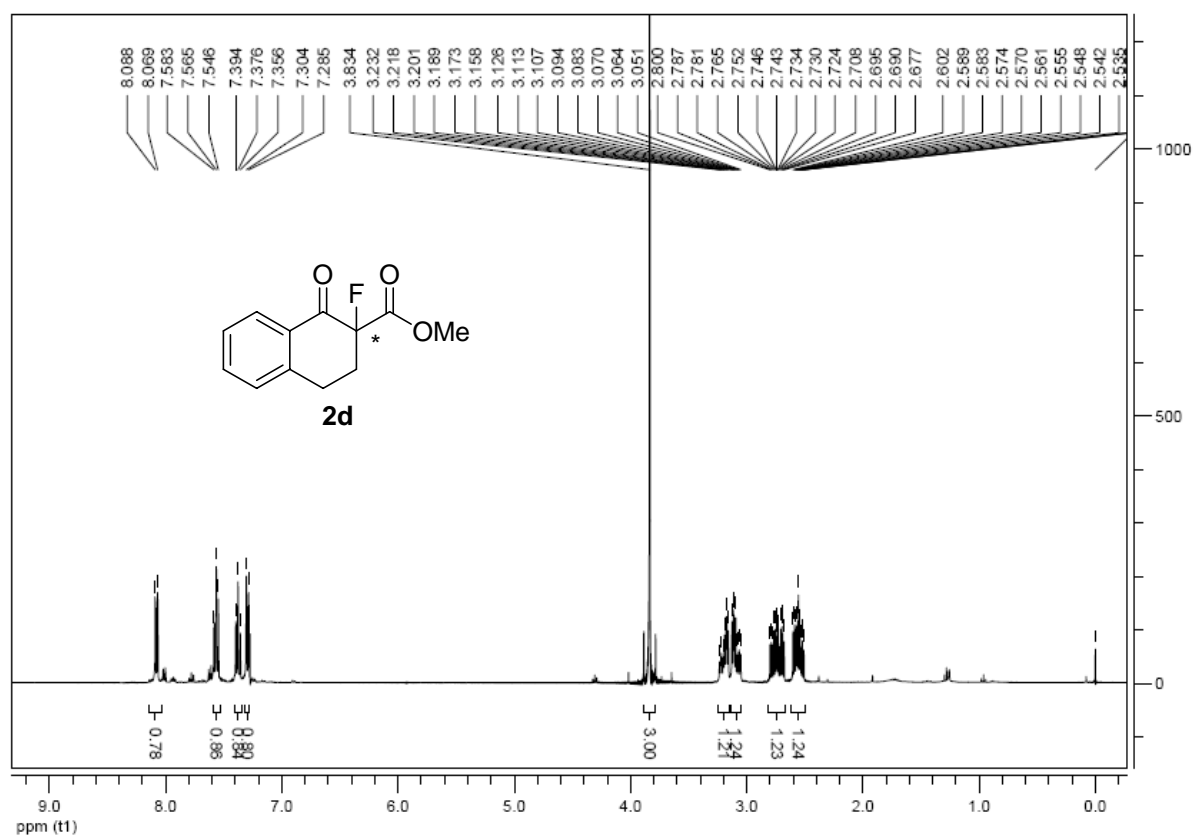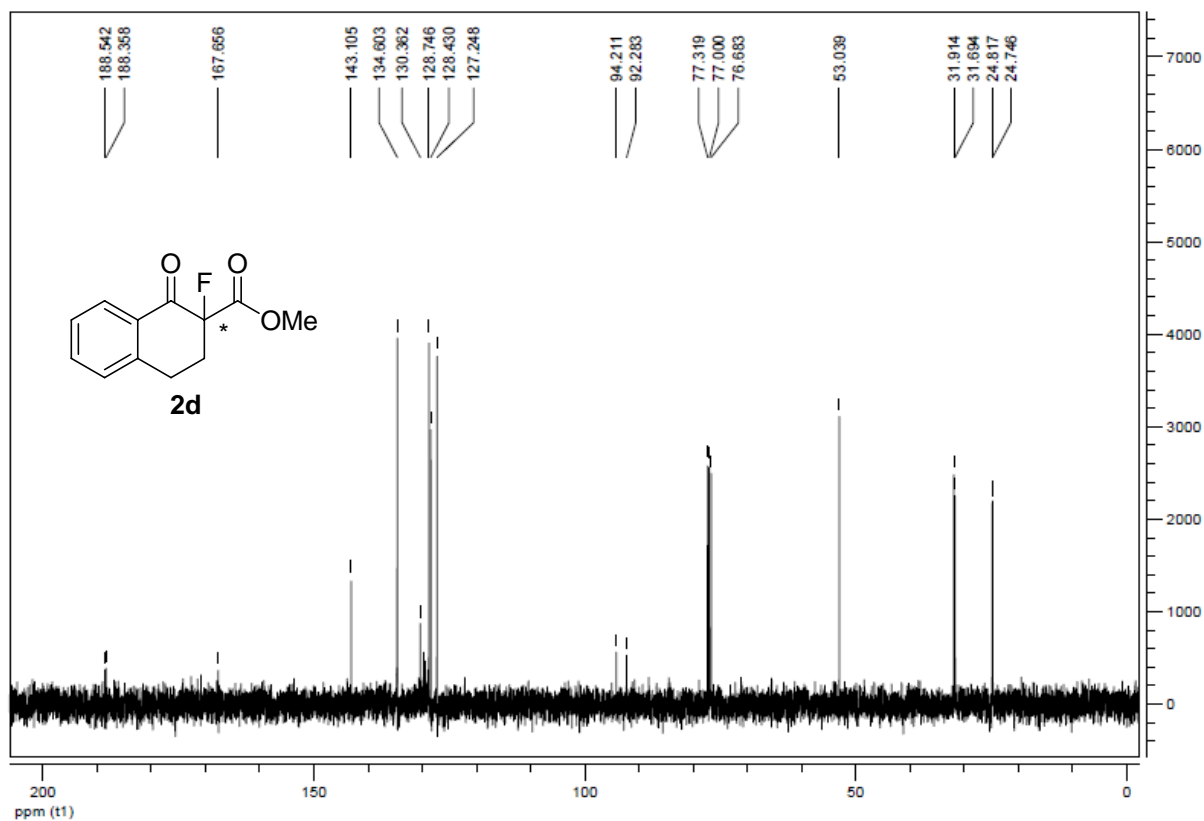

### Propyl 2-fluoro-2,3-dihydro-1-oxo-1*H*-indene-2-carboxylate (2e)

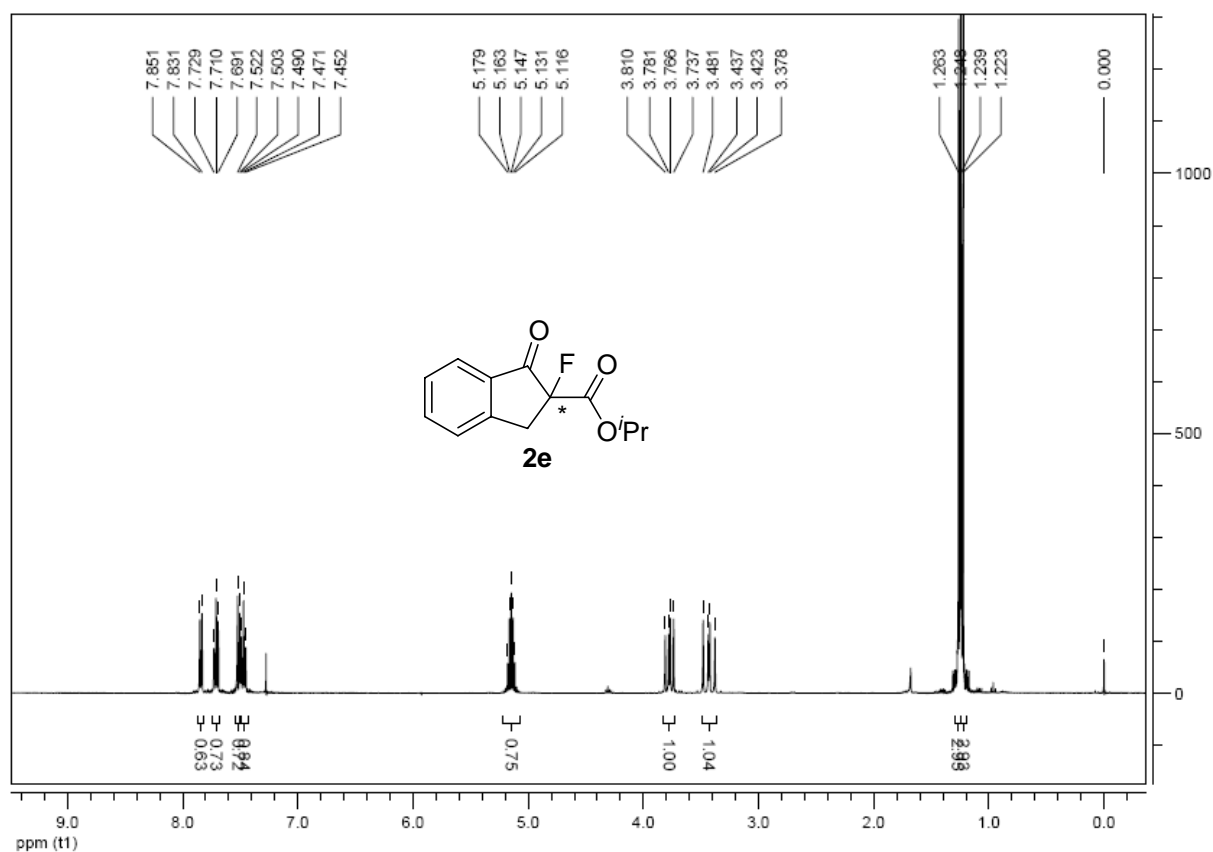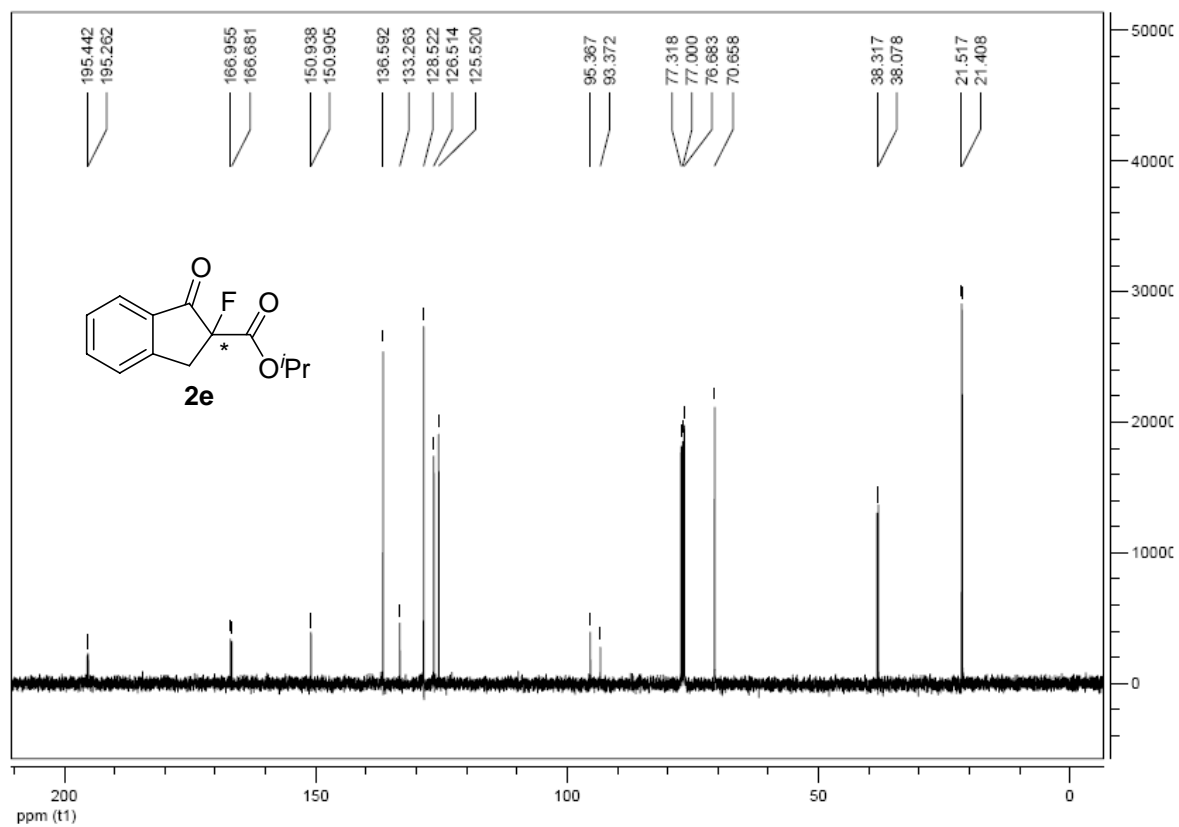

**(S)-tert-butyl 2-fluoro-2,3-dihydro-1-oxo-1H-indene-2-carboxylate (2f)**

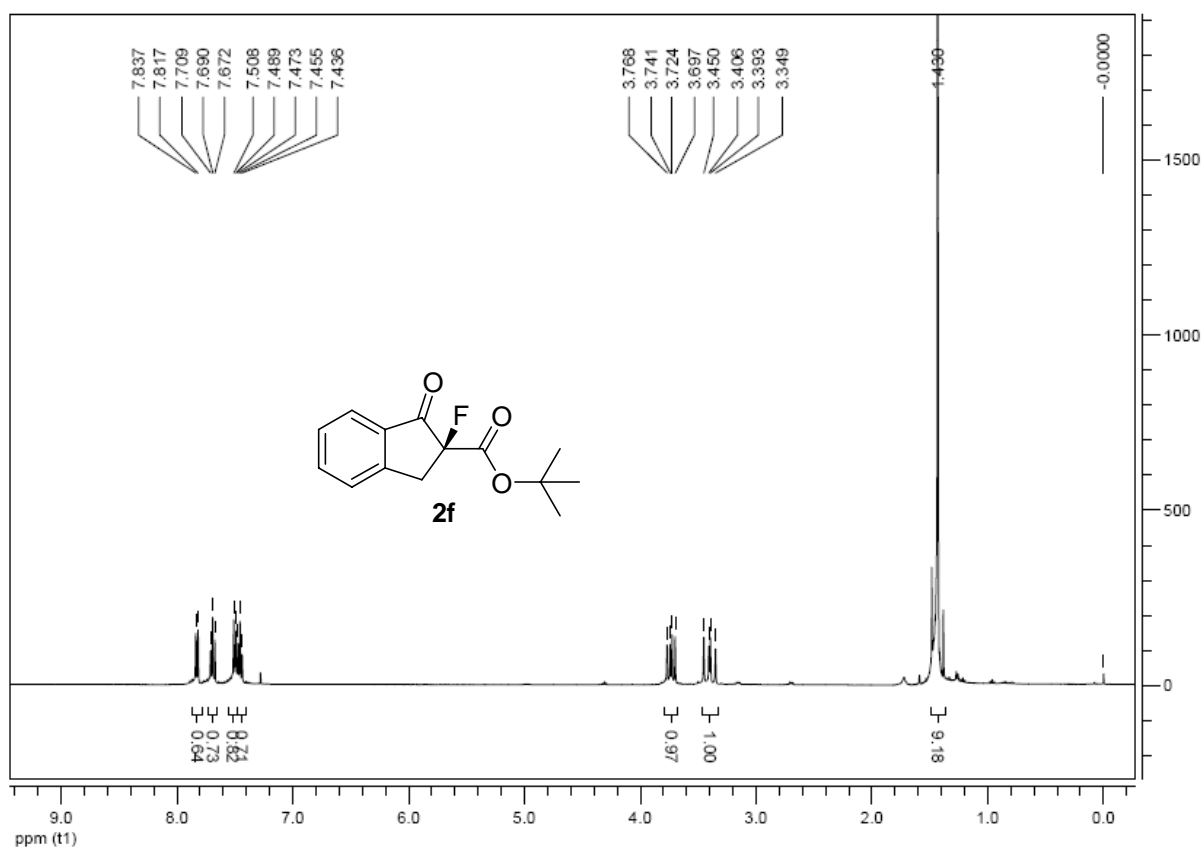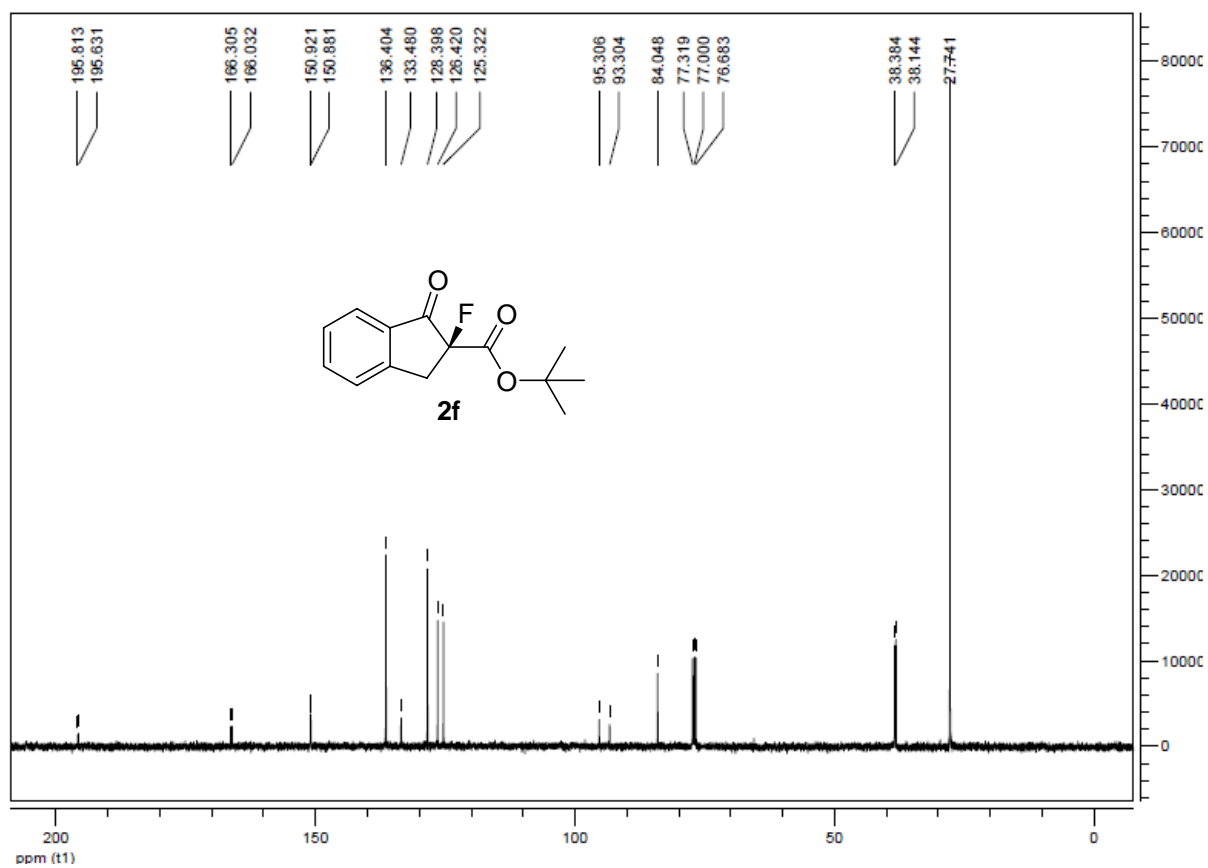



### Benzyl 2-fluoro-2,3-dihydro-1-oxo-1H-indene-2-carboxylate (2g)

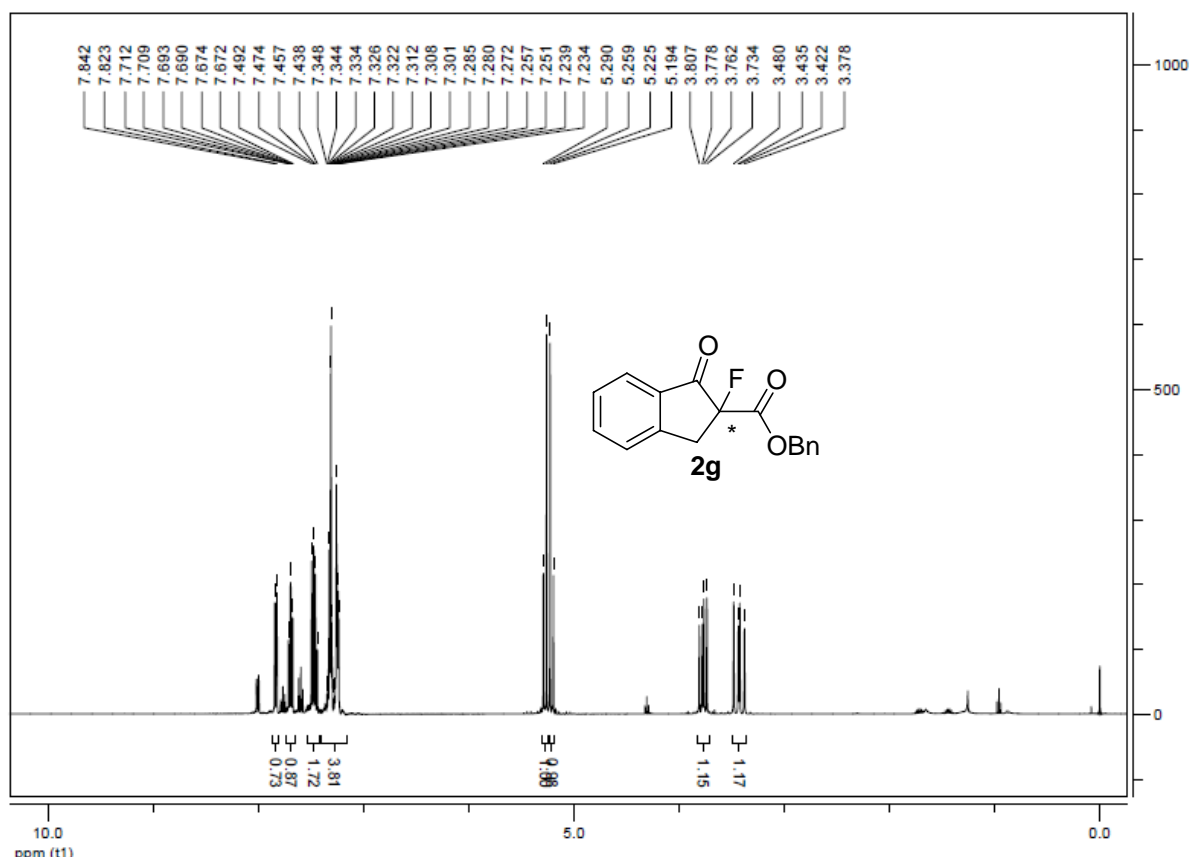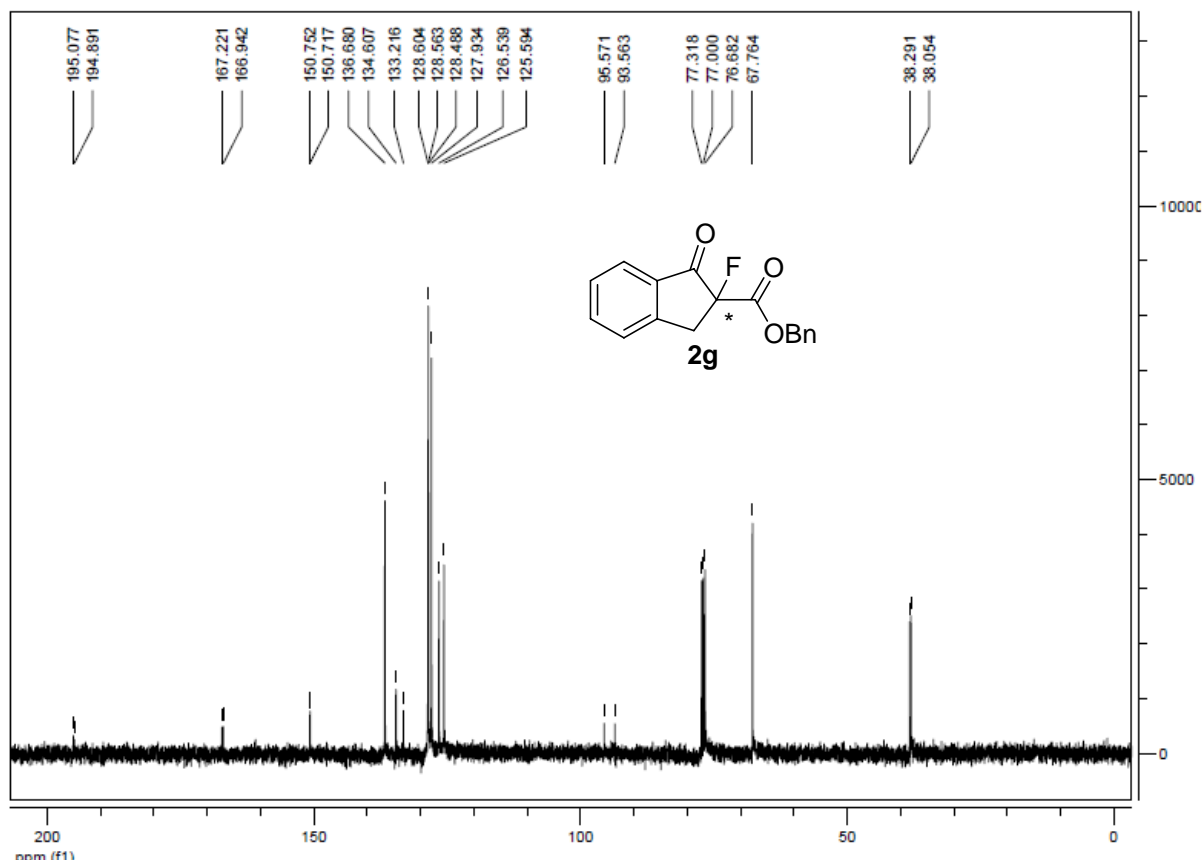

### Ethyl 2-fluoro-2,3-dihydro-6-methyl-1-oxo-1*H*-indene-2-carboxylate (**2h**)

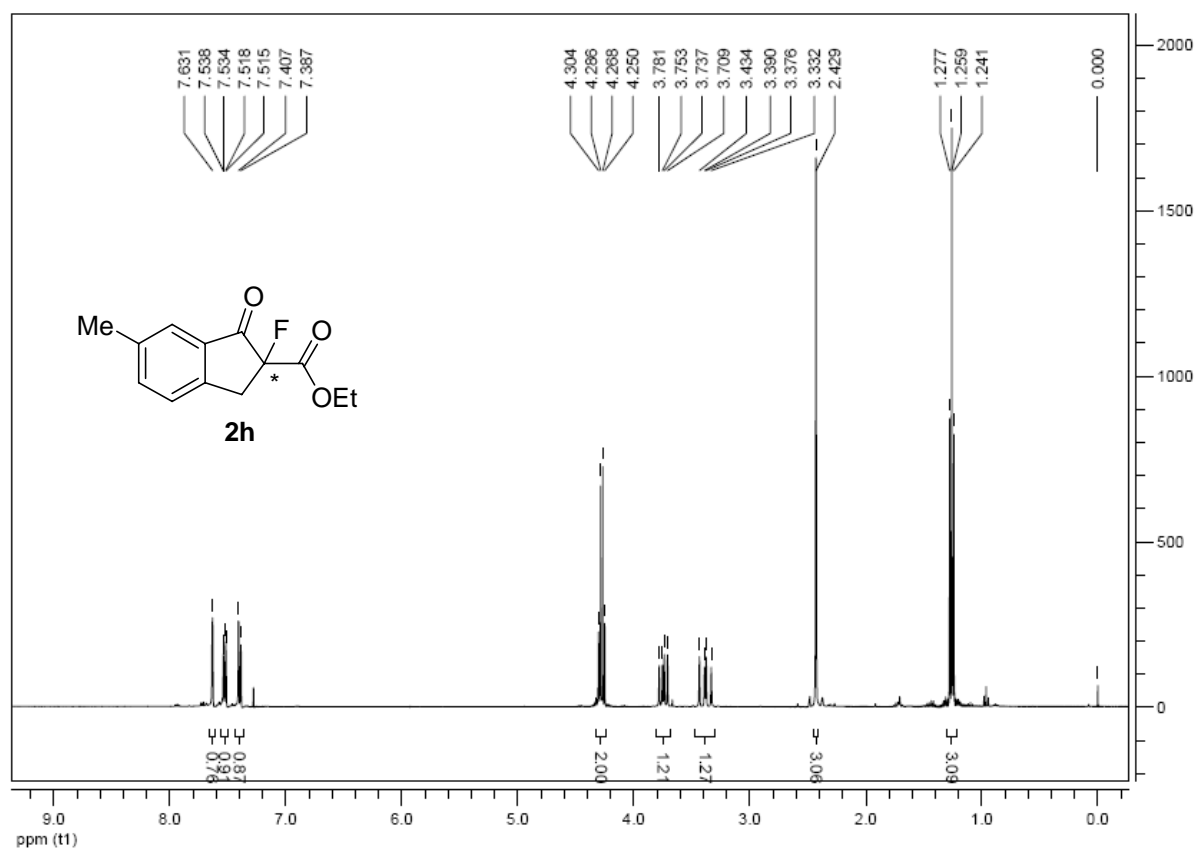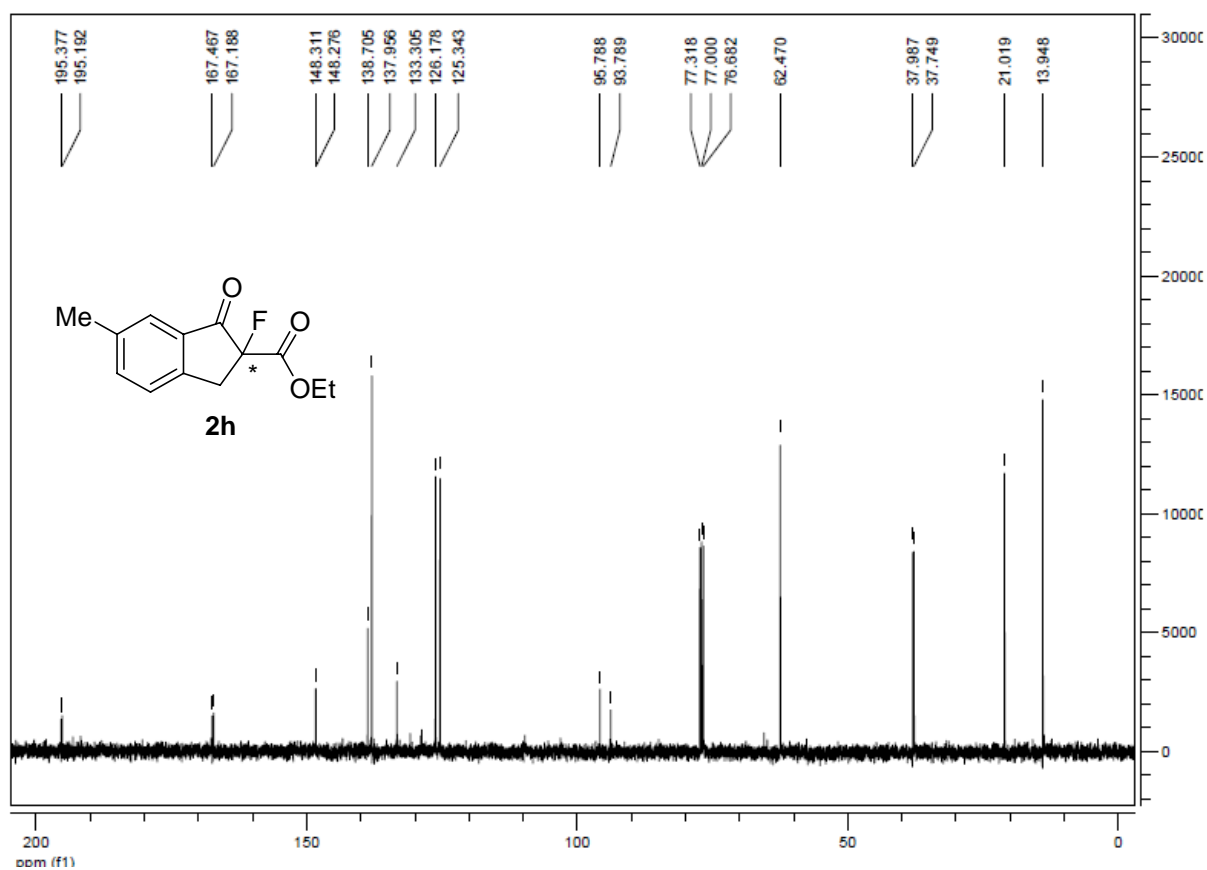

### Ethyl 2-fluoro-2,3-dihydro-5,6-dimethoxy-1-oxo-1*H*-indene-2-carboxylate (2i)

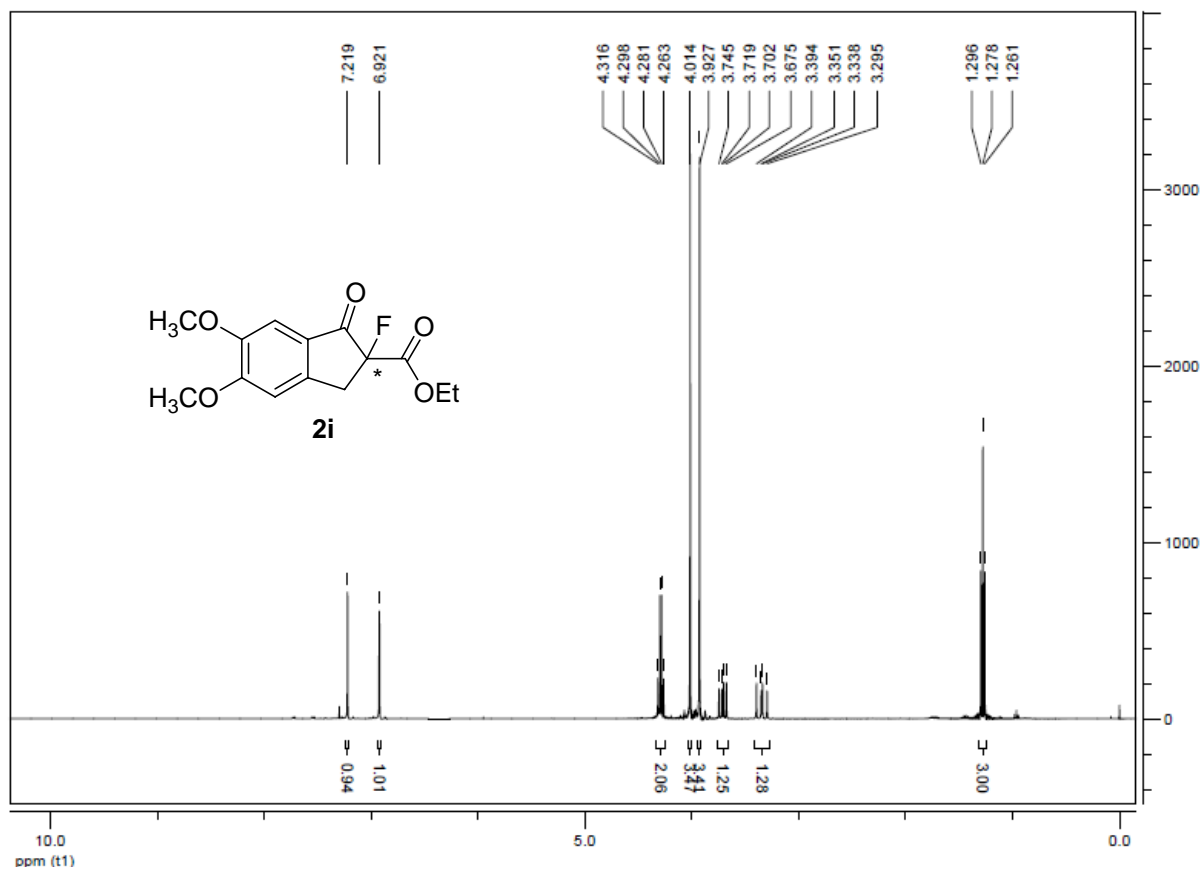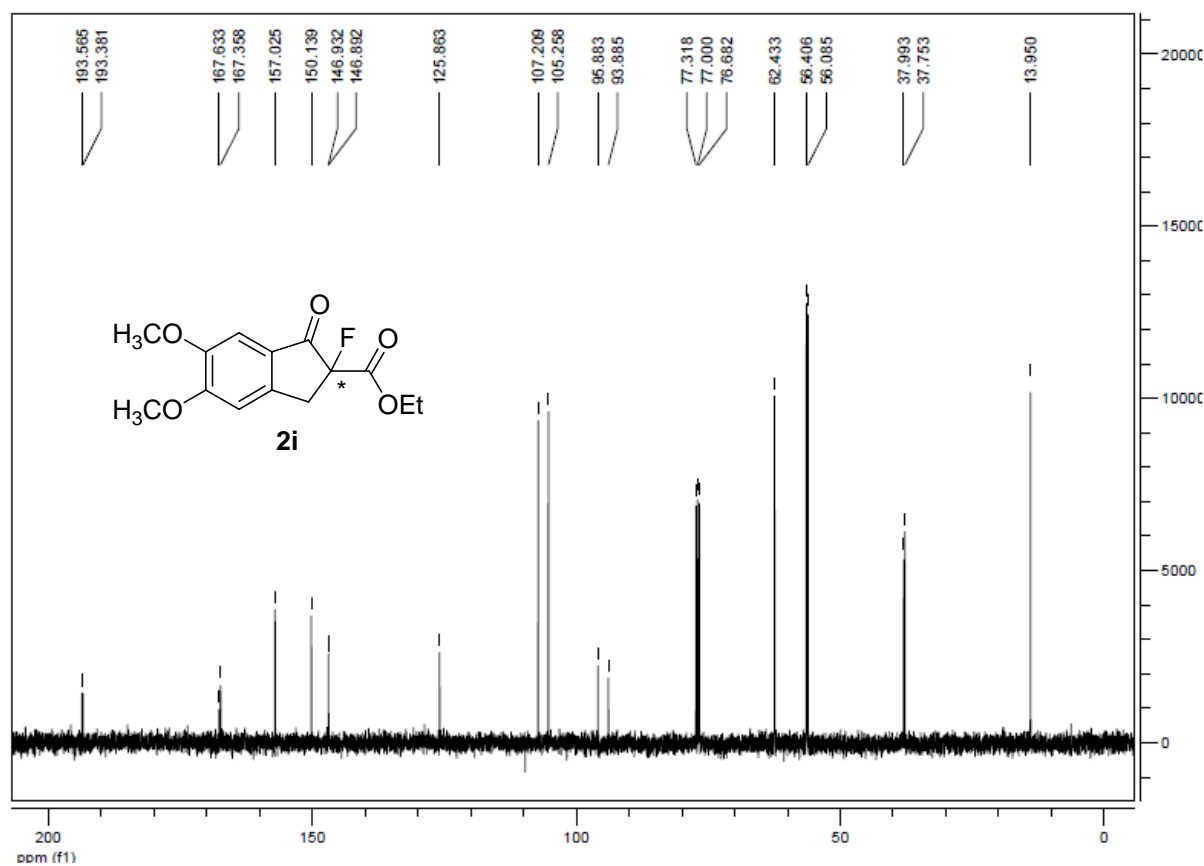

### Ethyl 5-chloro-2-fluoro-2,3-dihydro-1-oxo-1*H*-indene-2-carboxylate (2j)

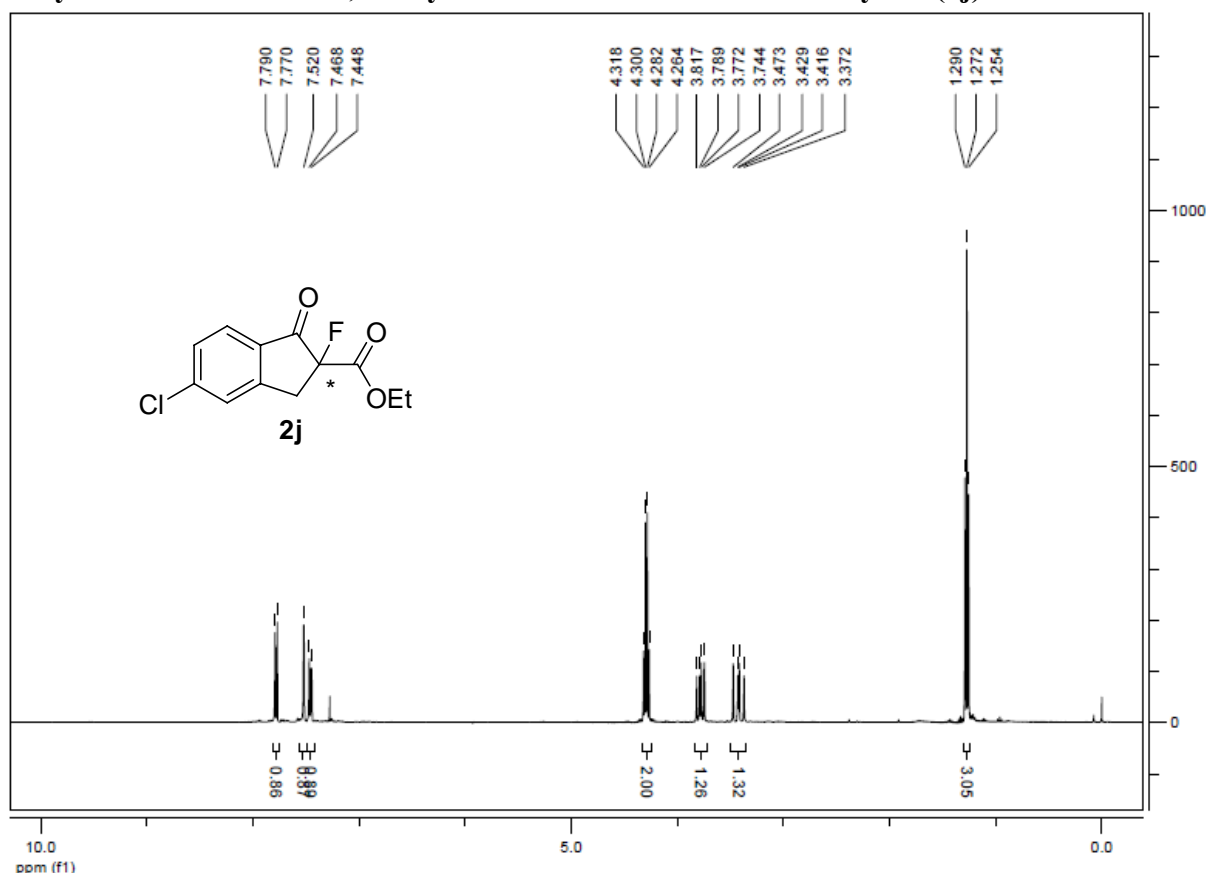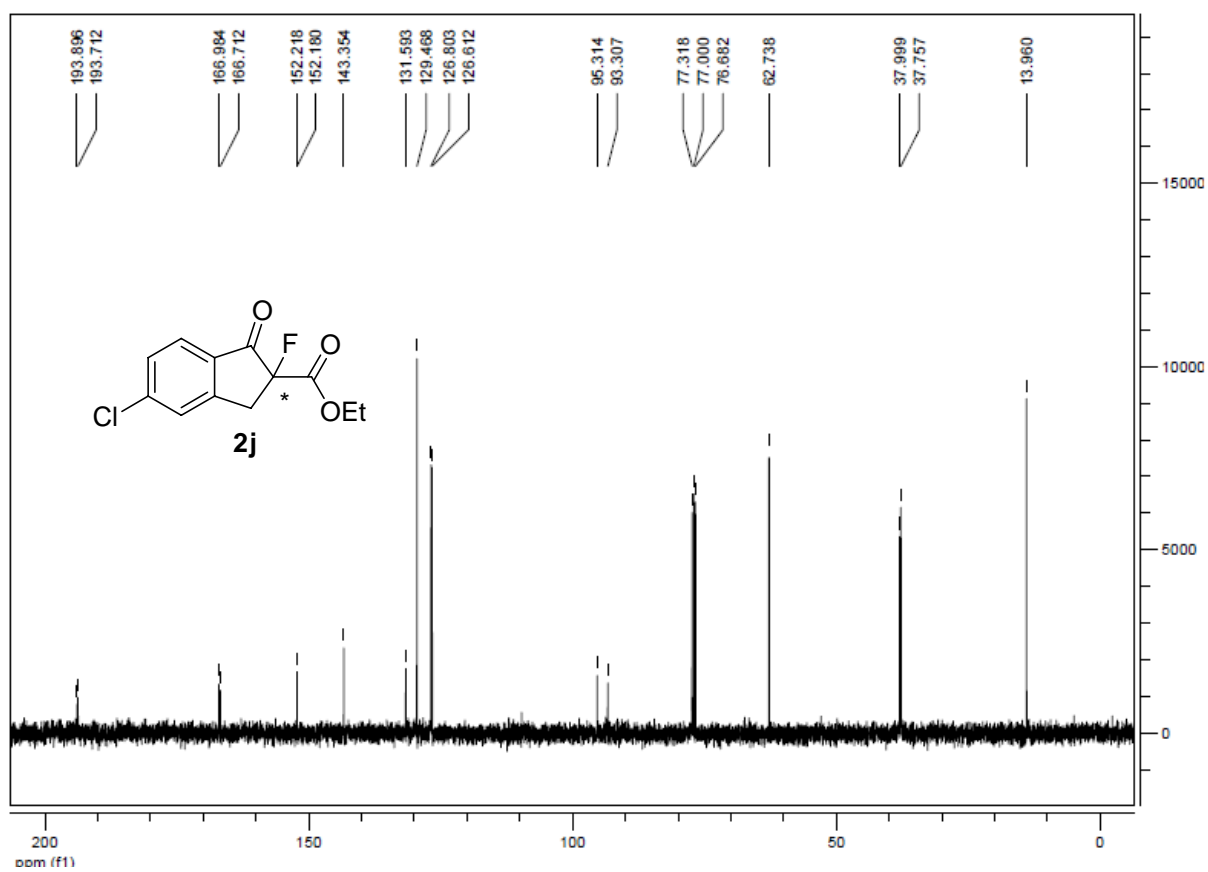

### Ethyl 5-bromo-2-fluoro-2,3-dihydro-1-oxo-1*H*-indene-2-carboxylate (2k)

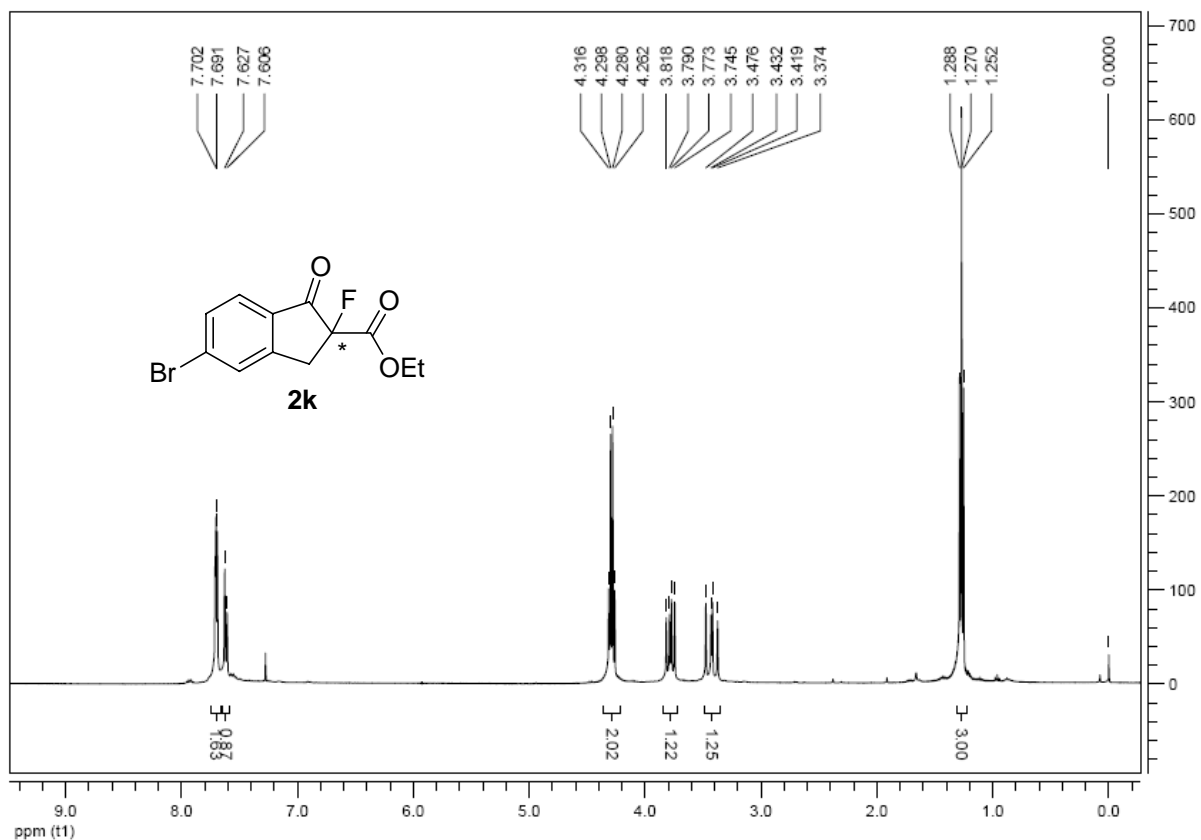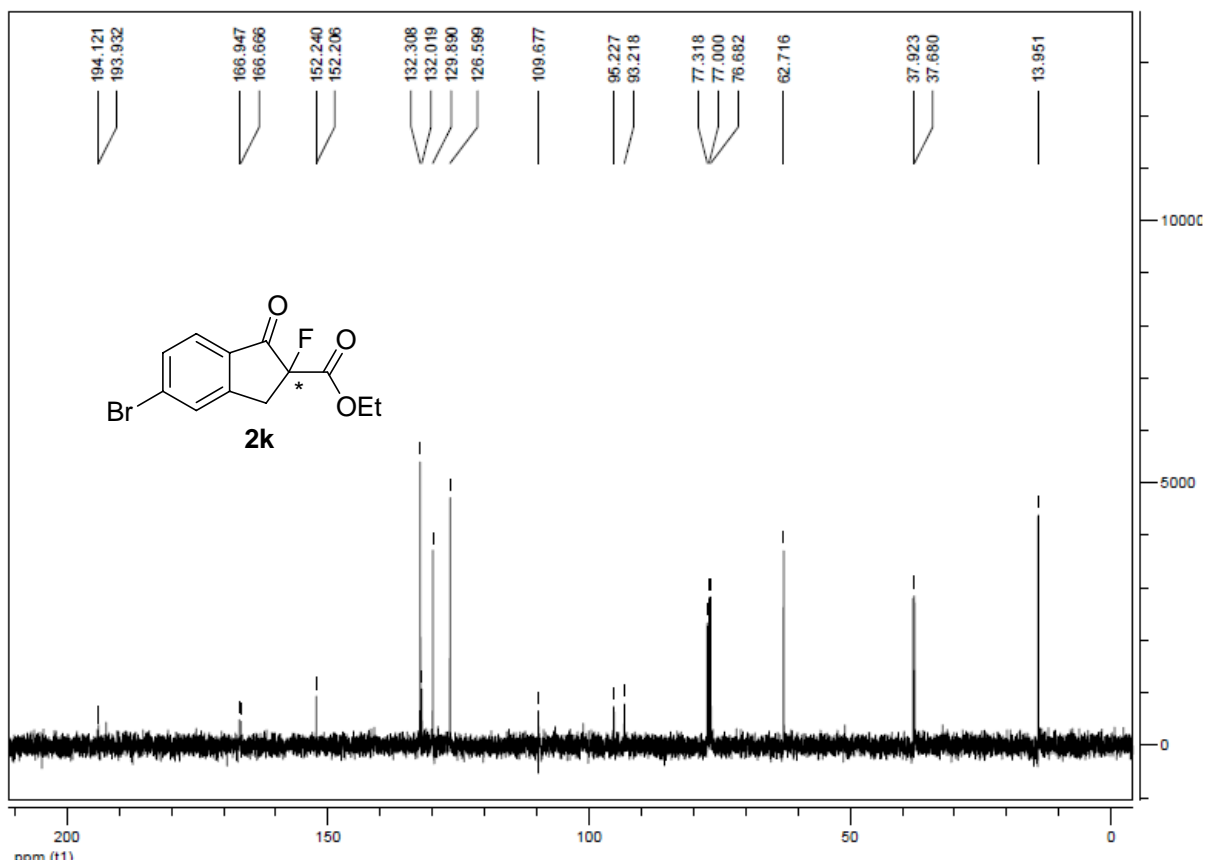

### N-butyl-2-fluoro-2,3-dihydro-1-oxo-1H-indene-2-carboxamide (2I)

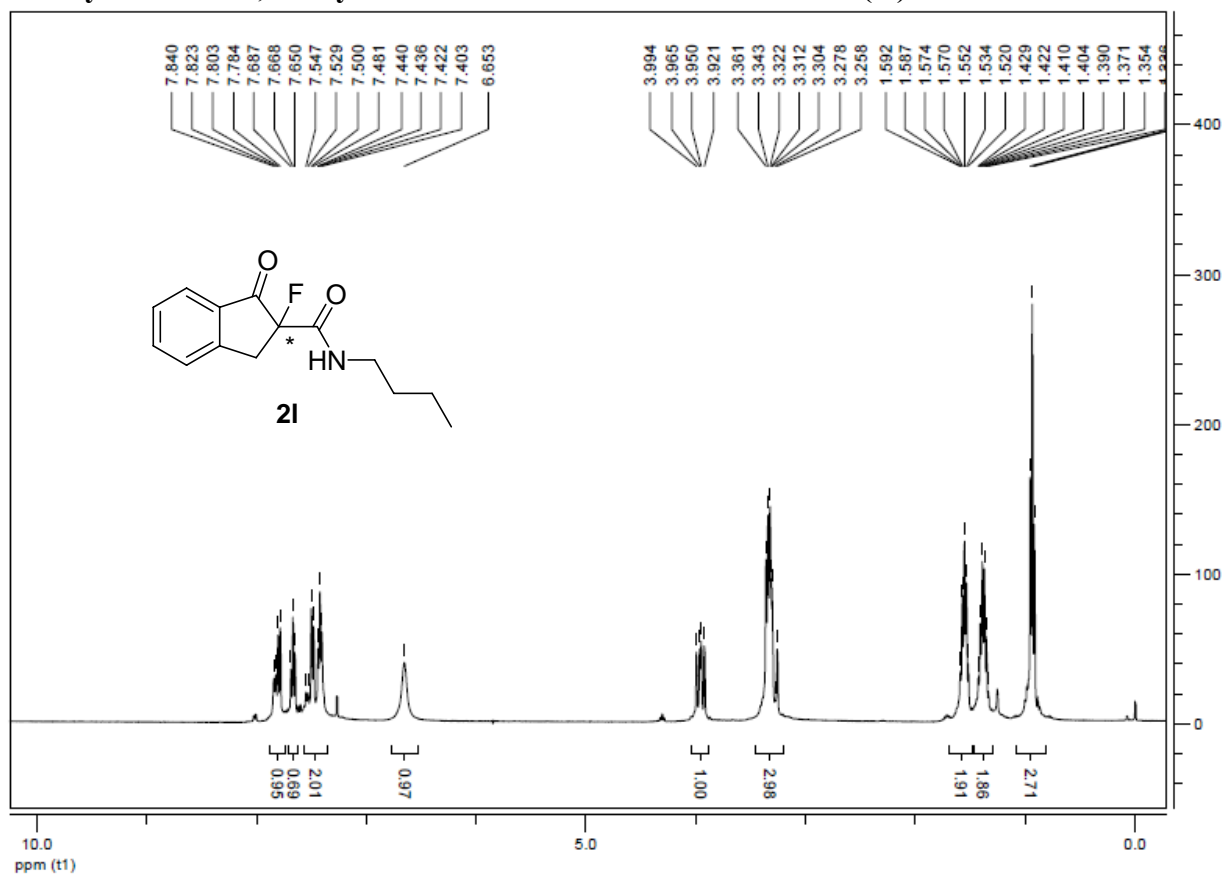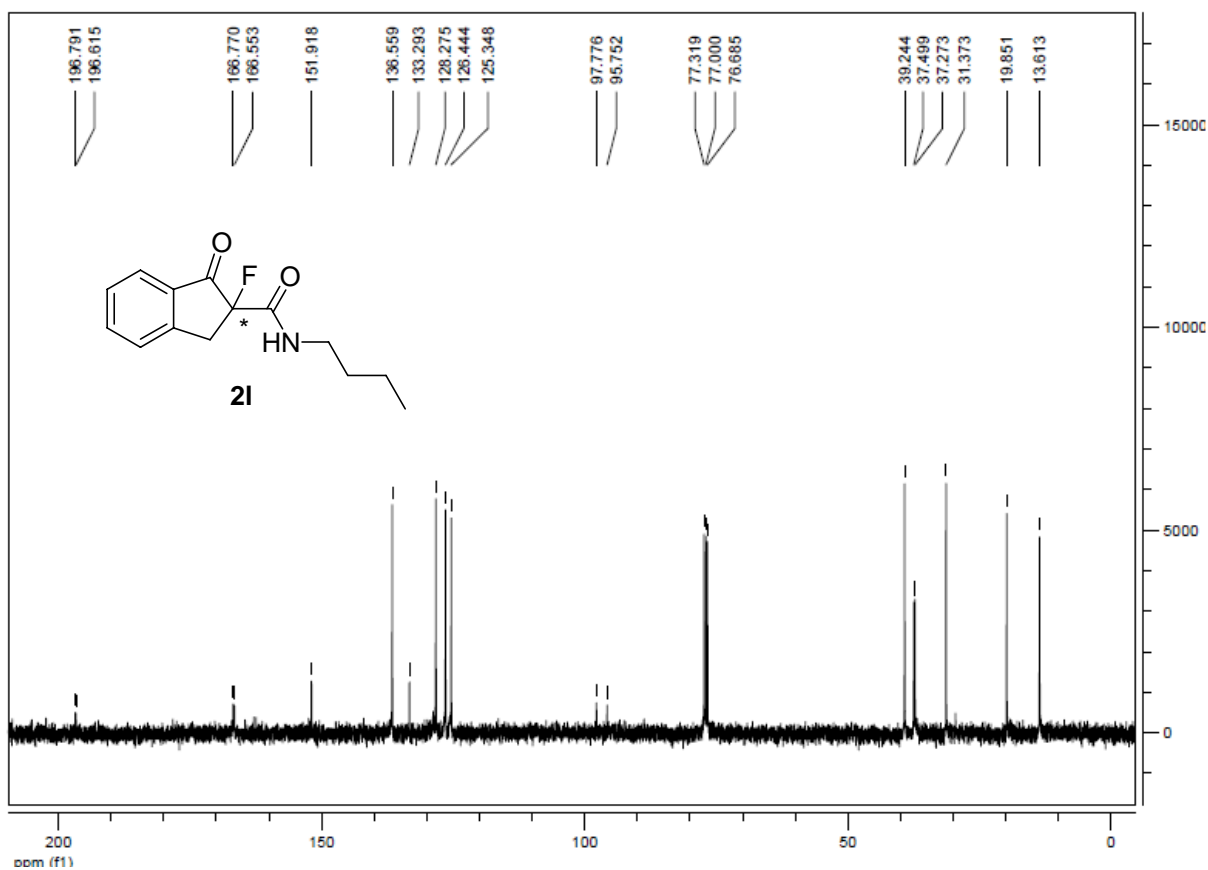

### 2-fluoro-2,3-dihydro-1-oxo-N-phenyl-1H-indene-2-carboxamide (2m)

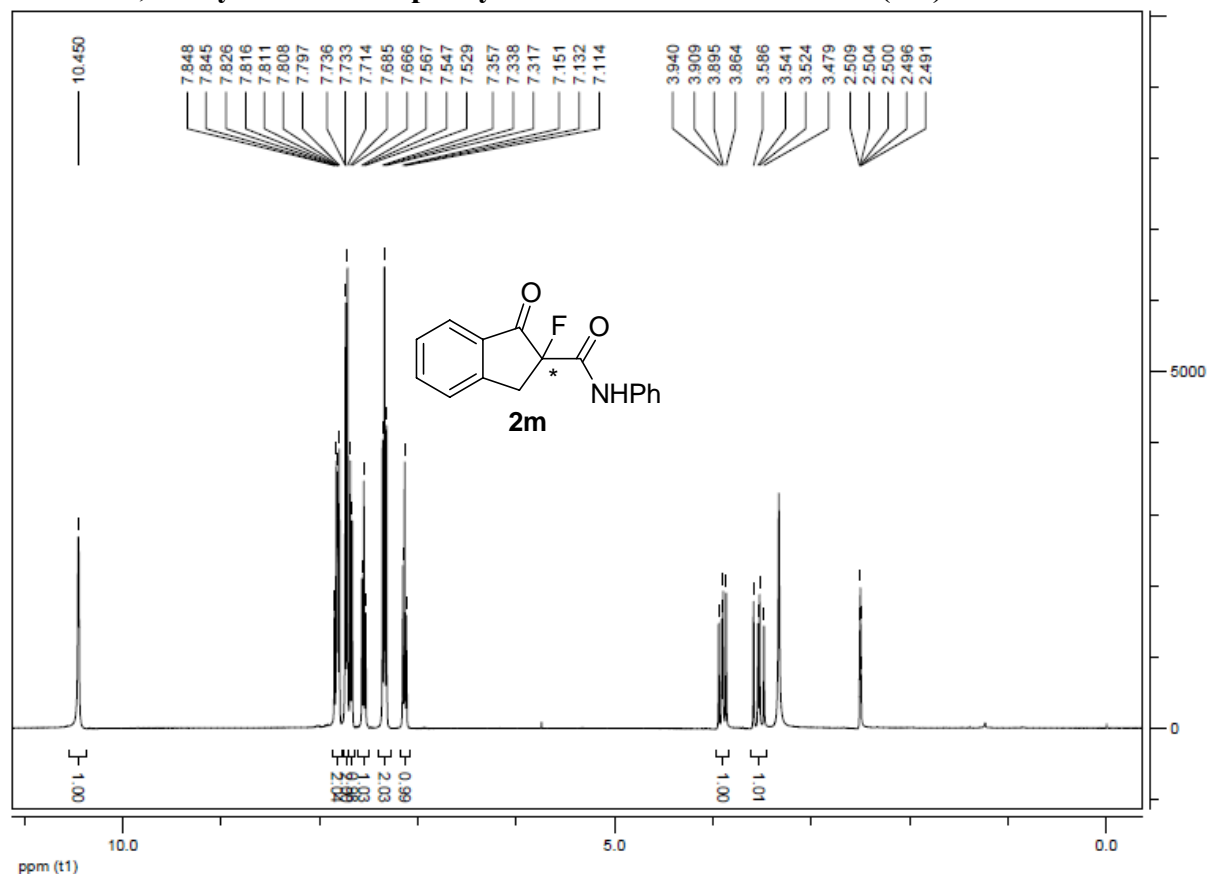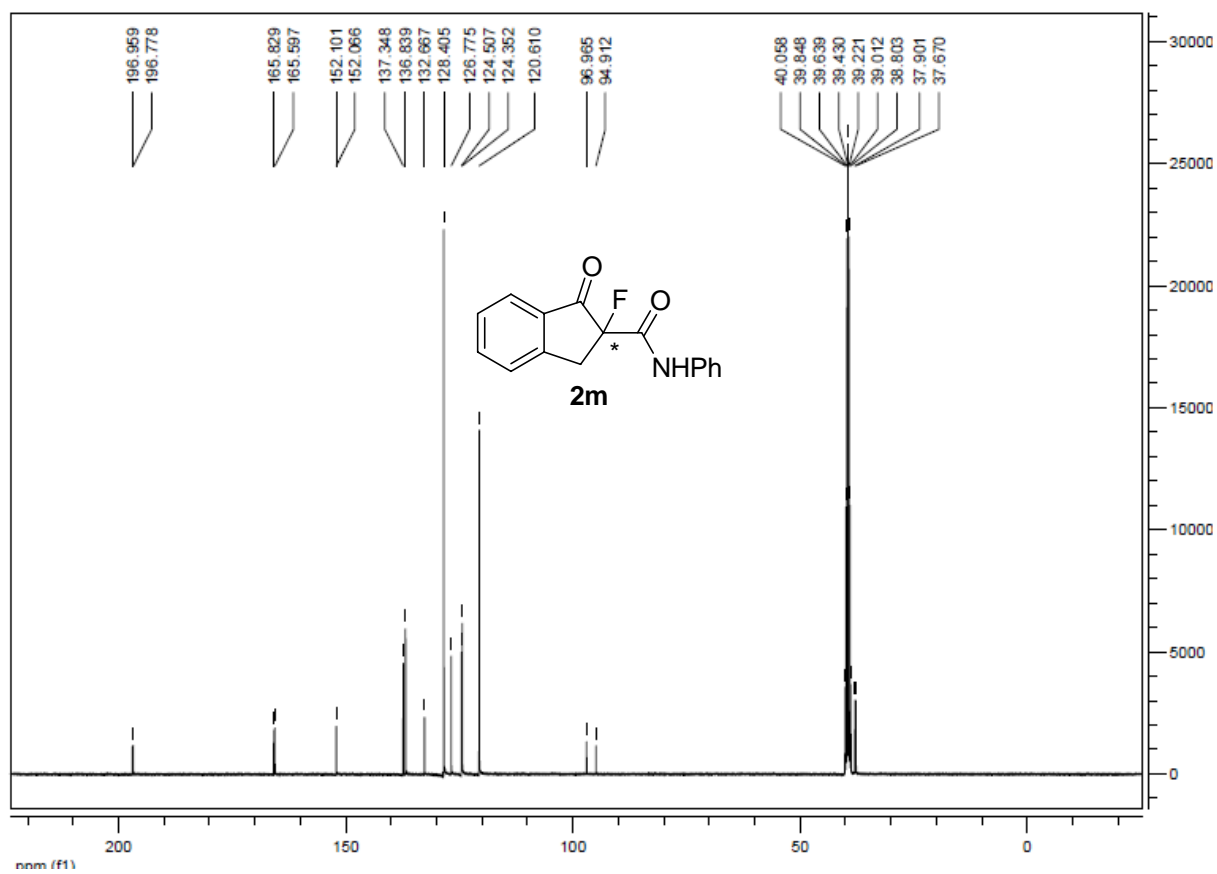

### N-benzyl-2-fluoro-2,3-dihydro-1-oxo-1H-indene-2-carboxamide (2n)

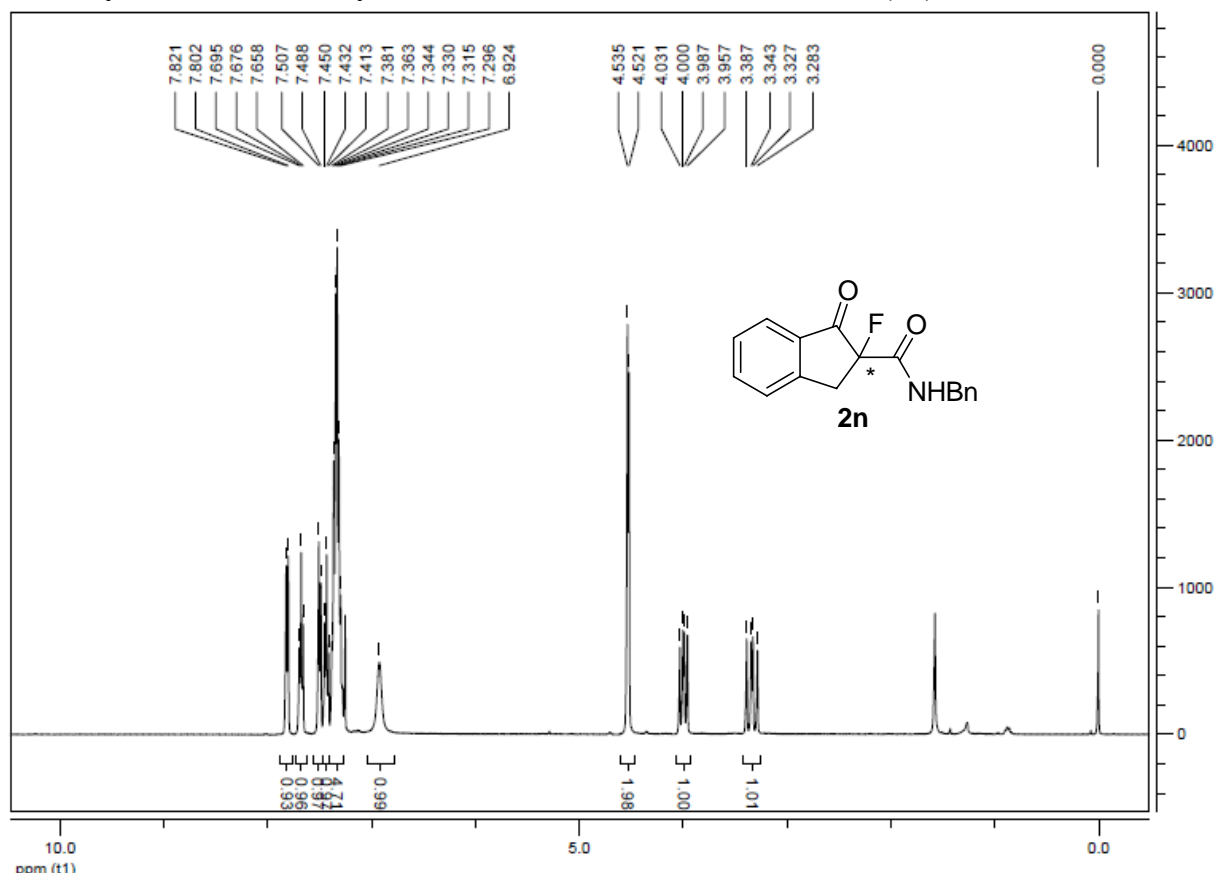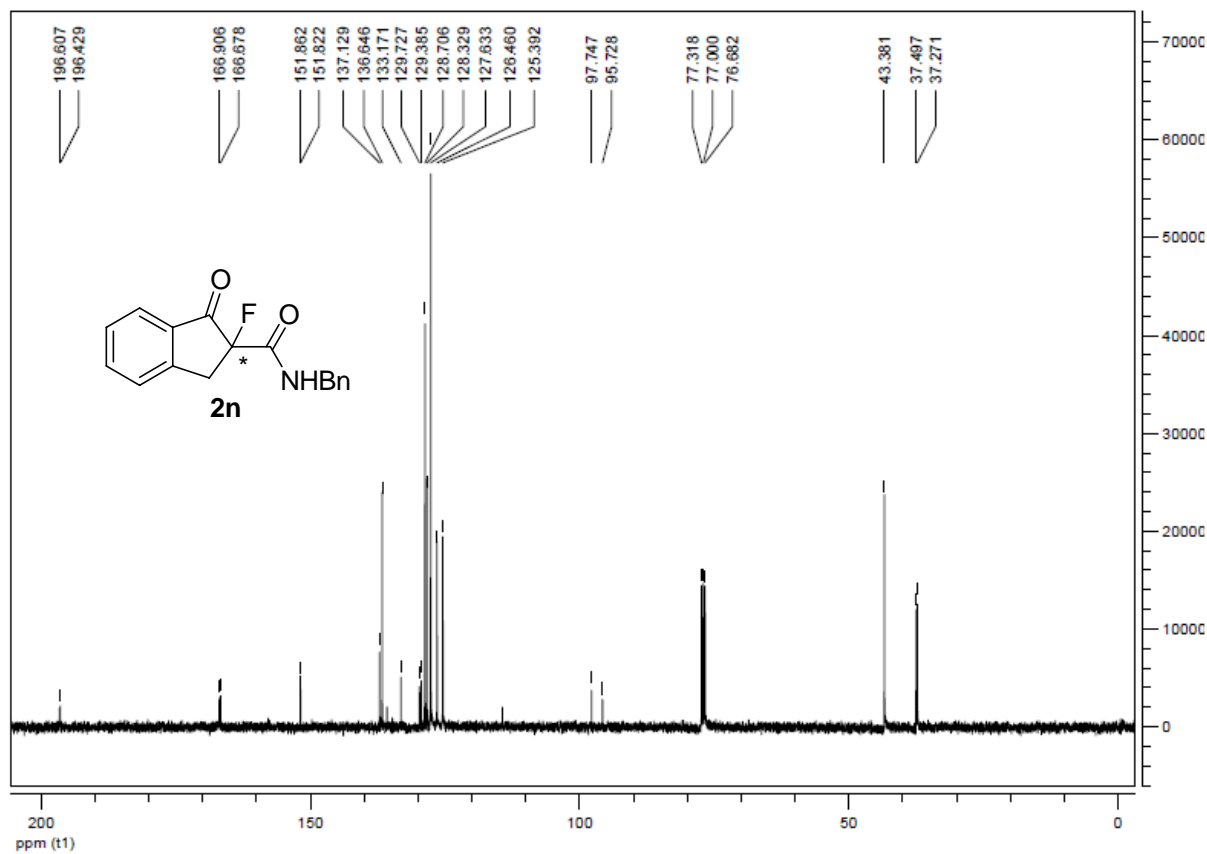



## Copies of HPLC chromatographs

### Ethyl 2-fluoro-2,3-dihydro-1-oxo-1*H*-indene-2-carboxylate (2a)

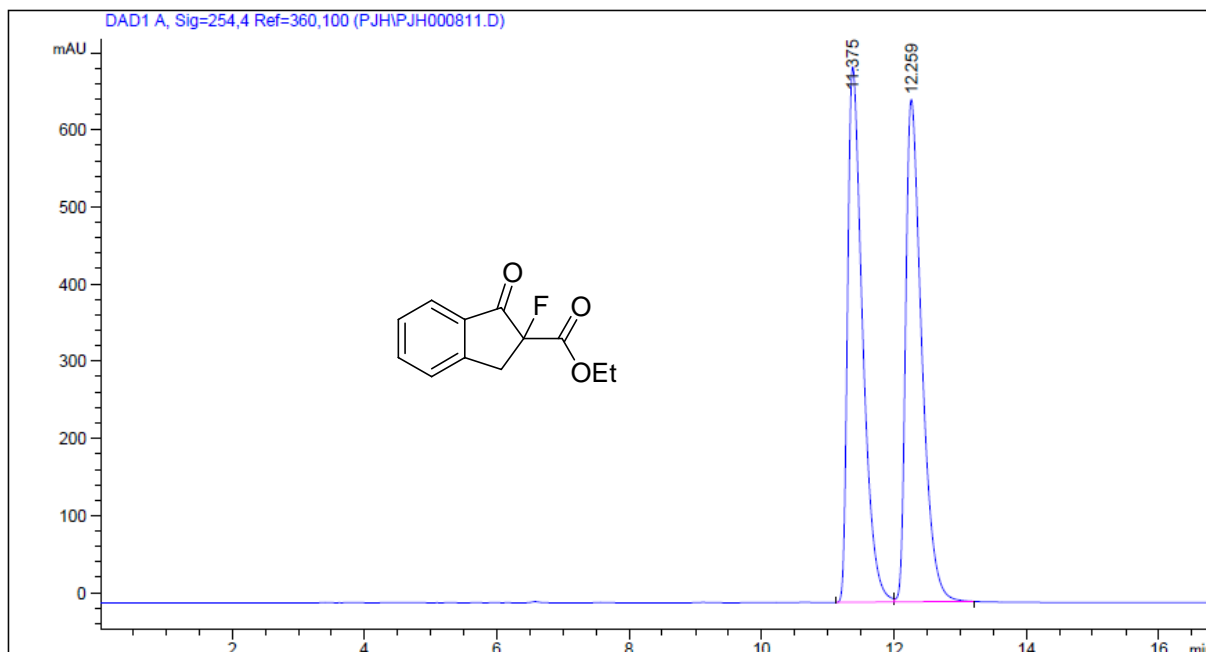

| Peak # | RetTime [min] | Type | Width [min] | Area [mAU*s] | Height [mAU] | Area %  |
|--------|---------------|------|-------------|--------------|--------------|---------|
| 1      | 11.375        | BV   | 0.2373      | 1.09120e4    | 694.50977    | 49.8435 |
| 2      | 12.259        | VB   | 0.2545      | 1.09805e4    | 651.90015    | 50.1565 |

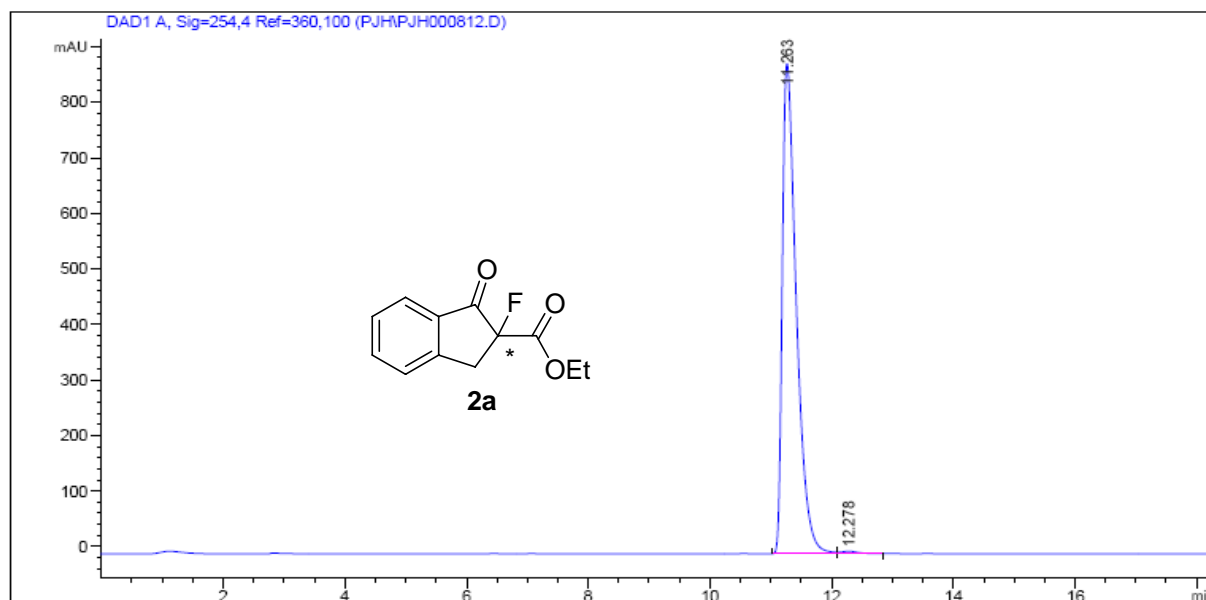

| Peak # | RetTime [min] | Type | Width [min] | Area [mAU*s] | Height [mAU] | Area %  |
|--------|---------------|------|-------------|--------------|--------------|---------|
| 1      | 11.263        | BB   | 0.2426      | 1.41218e4    | 882.70648    | 99.3810 |
| 2      | 12.278        | BB   | 0.2816      | 87.95527     | 4.50798      | 0.6190  |

### Ethyl 2-fluoro-1,2,3,4-tetrahydro-1-oxonaphthalene-2-carboxylate (2b)

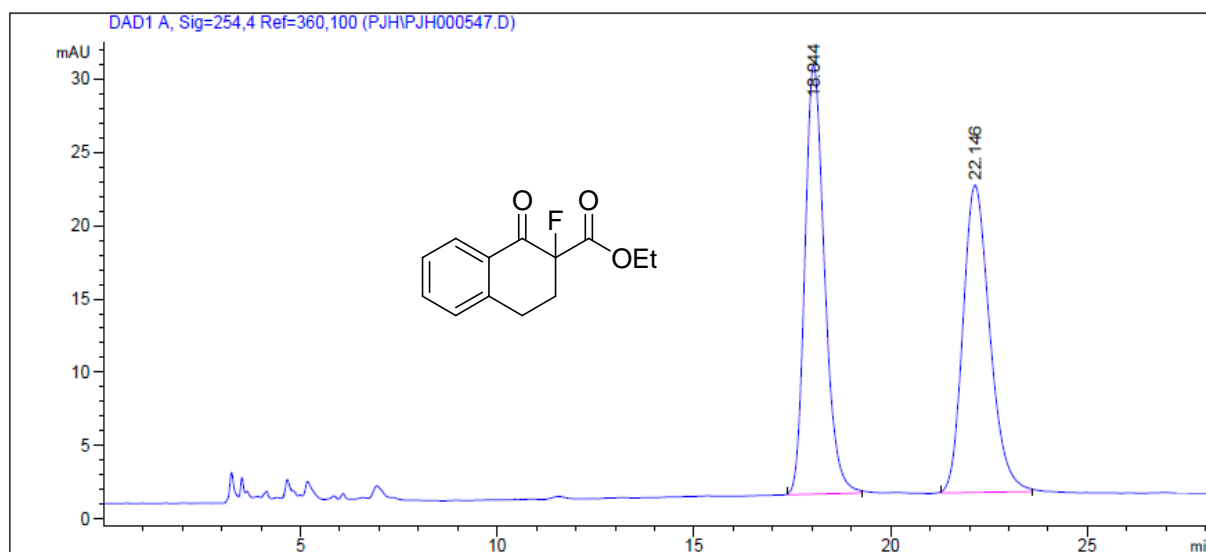

| Peak # | RetTime [min] | Type | Width [min] | Area [mAU*s] | Height [mAU] | Area %  |
|--------|---------------|------|-------------|--------------|--------------|---------|
| 1      | 18.044        | BB   | 0.5364      | 1012.91565   | 29.22315     | 50.5652 |
| 2      | 22.146        | BB   | 0.7321      | 990.27252    | 20.92777     | 49.4348 |

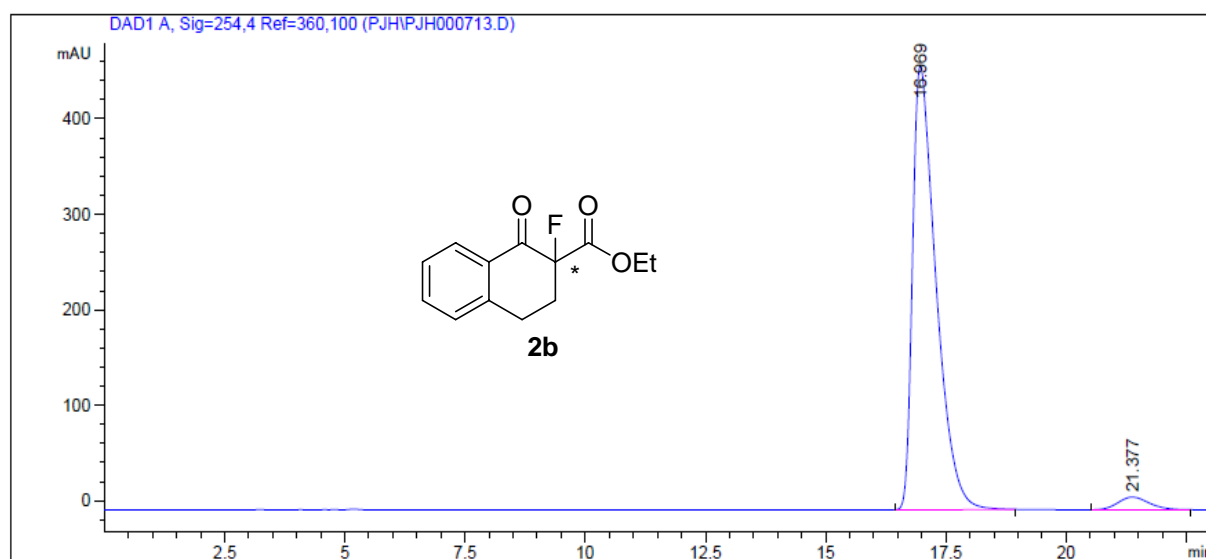

| Peak # | RetTime [min] | Type | Width [min] | Area [mAU*s] | Height [mAU] | Area %  |
|--------|---------------|------|-------------|--------------|--------------|---------|
| 1      | 16.969        | BB   | 0.5090      | 1.57344e4    | 464.77914    | 96.2966 |
| 2      | 21.377        | BB   | 0.7011      | 605.10883    | 13.29238     | 3.7034  |

### Benzyl 2-fluoro-1,2,3,4-tetrahydro-1-oxonaphthalene-2-carboxylate (2c)

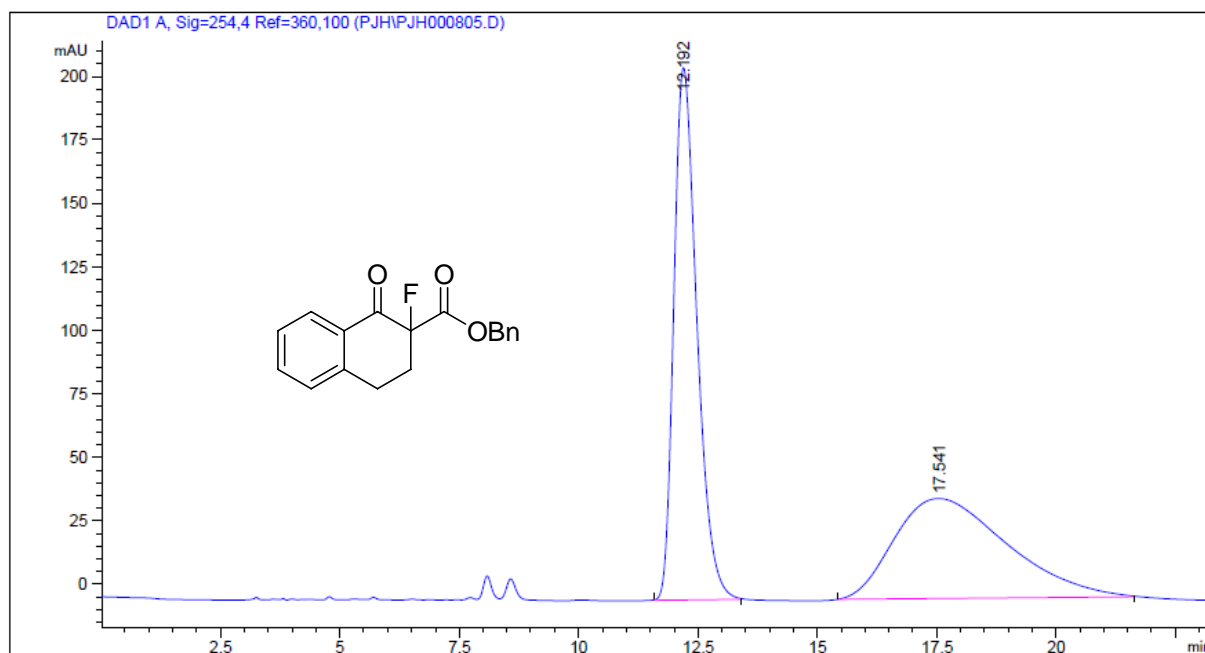

| Peak # | RetTime [min] | Type | Width [min] | Area [mAU*s] | Height [mAU] | Area %  |
|--------|---------------|------|-------------|--------------|--------------|---------|
| 1      | 12.192        | BB   | 0.5158      | 7037.55078   | 209.56975    | 51.9409 |
| 2      | 17.541        | BB   | 2.0103      | 6511.60547   | 39.51986     | 48.0591 |

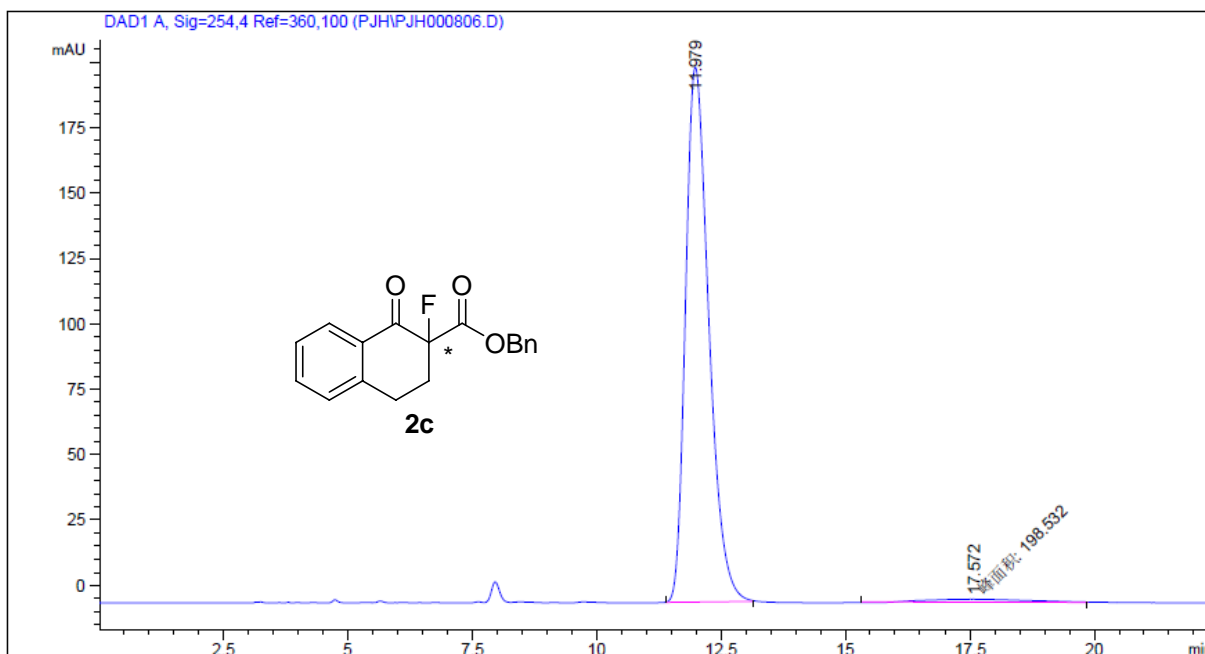

| Peak # | RetTime [min] | Type | Width [min] | Area [mAU*s] | Height [mAU] | Area %  |
|--------|---------------|------|-------------|--------------|--------------|---------|
| 1      | 11.979        | BB   | 0.5011      | 6646.14307   | 204.53091    | 97.0995 |
| 2      | 17.572        | MM   | 2.5888      | 198.53157    | 1.27814      | 2.9005  |

### Methyl 2-fluoro-1,2,3,4-tetrahydro-1-oxonaphthalene-2-carboxylate (2d)

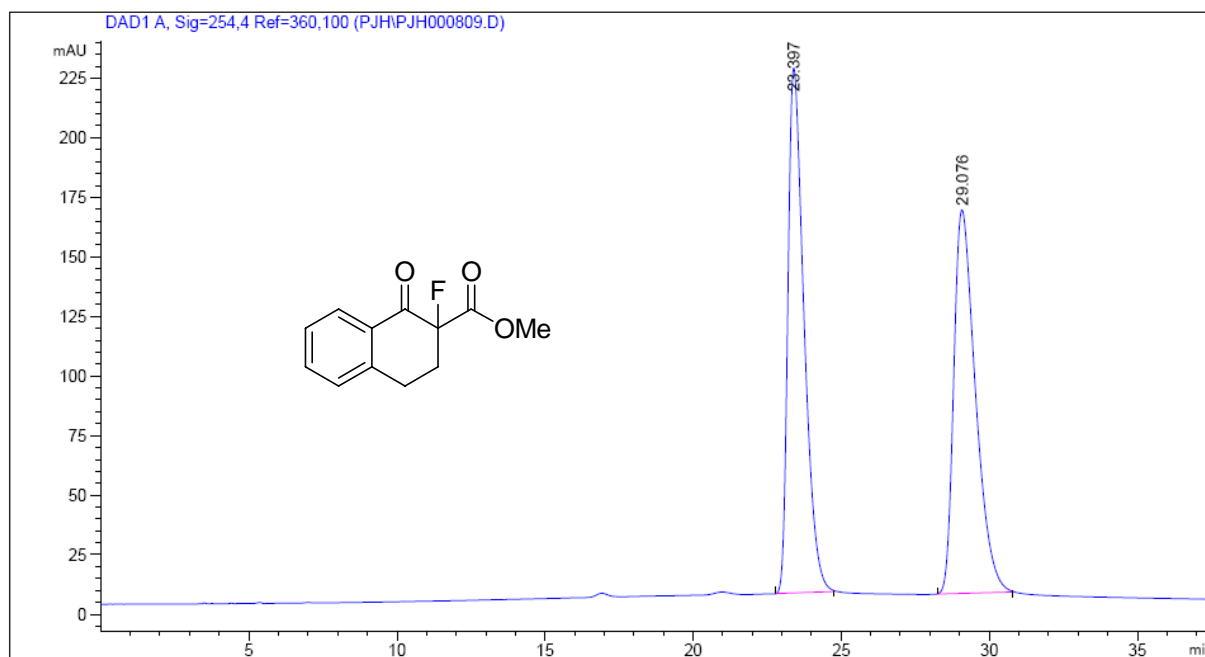

| Peak # | RetTime [min] | Type | Width [min] | Area [mAU*s] | Height [mAU] | Area %  |
|--------|---------------|------|-------------|--------------|--------------|---------|
| 1      | 23.397        | BB   | 0.5719      | 8308.37500   | 220.34935    | 50.2913 |
| 2      | 29.076        | BB   | 0.7770      | 8212.13770   | 161.02727    | 49.7087 |

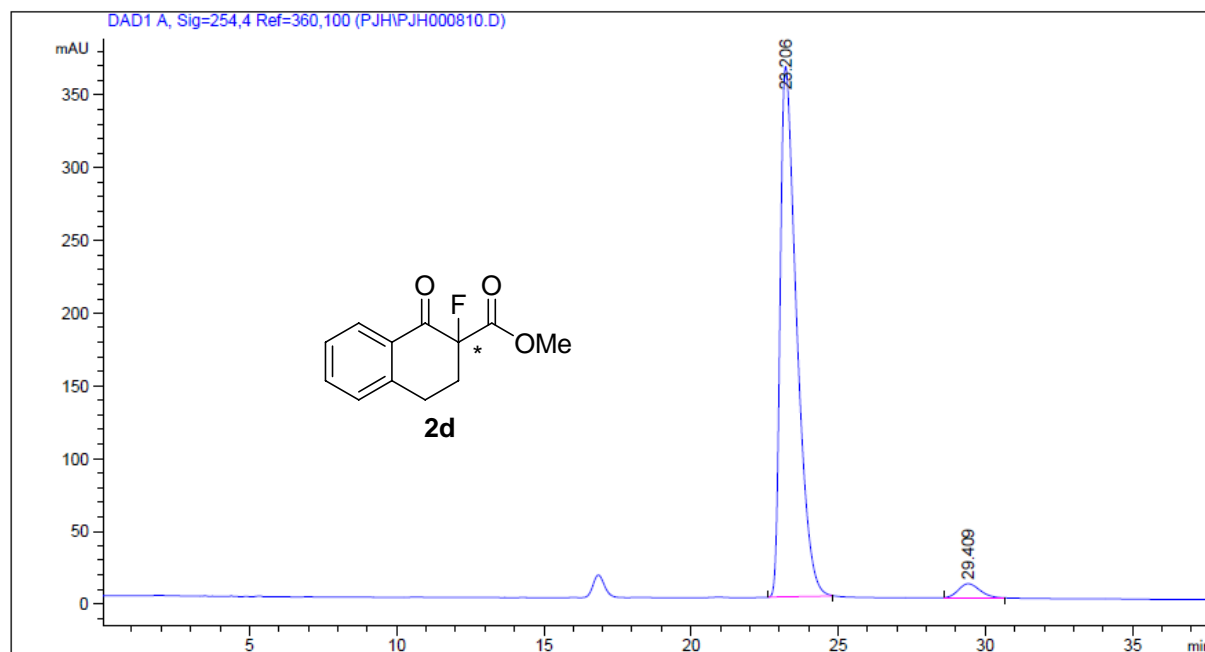

| Peak # | RetTime [min] | Type | Width [min] | Area [mAU*s] | Height [mAU] | Area %  |
|--------|---------------|------|-------------|--------------|--------------|---------|
| 1      | 23.206        | BB   | 0.5842      | 1.42036e4    | 364.82834    | 96.6882 |
| 2      | 29.409        | BB   | 0.7506      | 486.50897    | 9.64332      | 3.3118  |

### Propyl 2-fluoro-2,3-dihydro-1-oxo-1H-indene-2-carboxylate (2e)

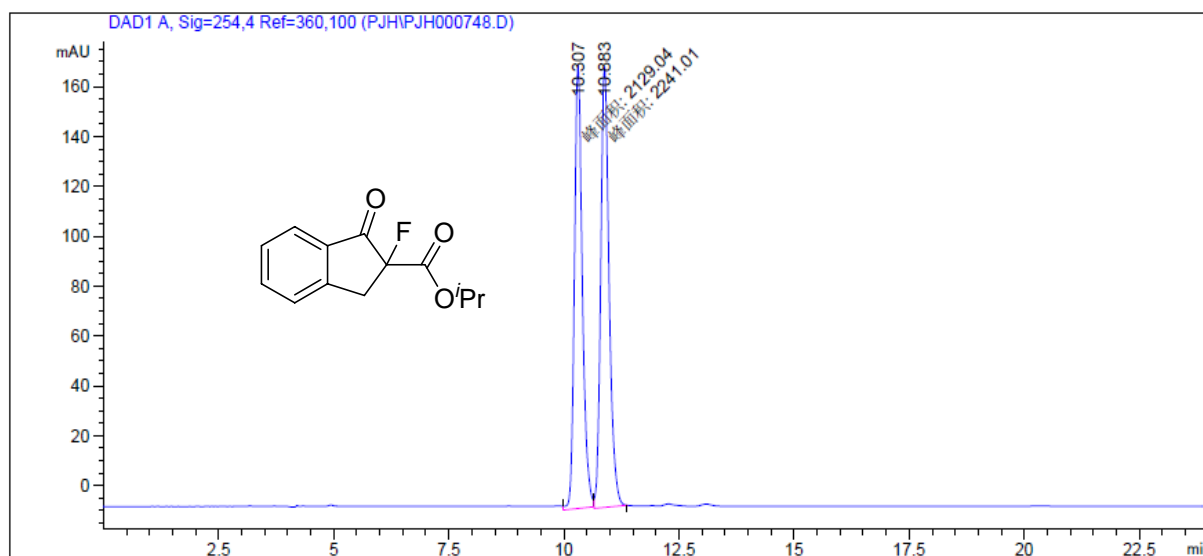

| Peak # | RetTime [min] | Type | Width [min] | Area [mAU*s] | Height [mAU] | Area %  |
|--------|---------------|------|-------------|--------------|--------------|---------|
| 1      | 10.307        | MM   | 0.1990      | 2129.04492   | 178.27754    | 48.7190 |
| 2      | 10.883        | MM   | 0.2111      | 2241.00928   | 176.89294    | 51.2810 |

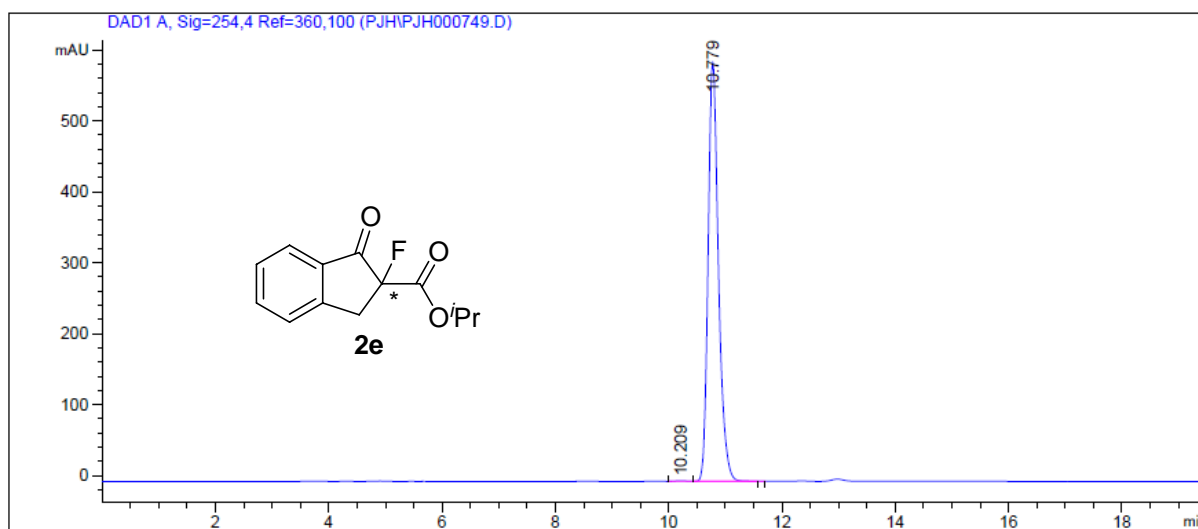

| Peak # | RetTime [min] | Type | Width [min] | Area [mAU*s] | Height [mAU] | Area %  |
|--------|---------------|------|-------------|--------------|--------------|---------|
| 1      | 10.209        | VB S | 0.2155      | 14.91566     | 1.01448      | 0.1987  |
| 2      | 10.779        | BB T | 0.1917      | 7491.82568   | 591.62146    | 99.8013 |

**tert-Butyl 2-fluoro-2,3-dihydro-1-oxo-1H-indene-2-carboxylate (2f)**

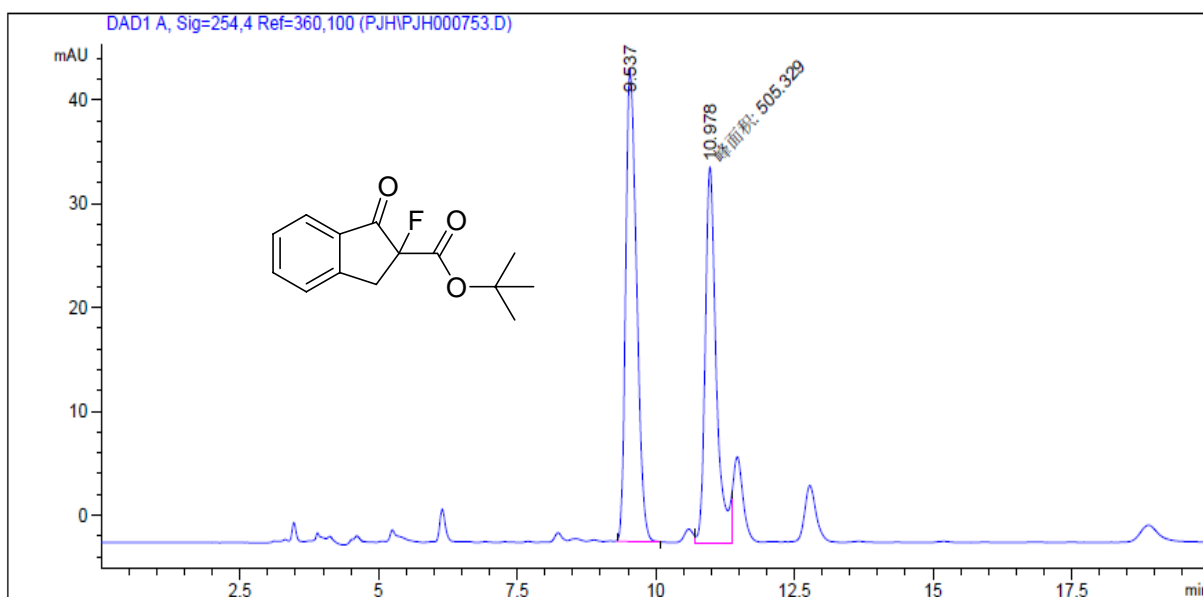

| Peak # | RetTime [min] | Type | Width [min] | Area [mAU*s] | Height [mAU] | Area %  |
|--------|---------------|------|-------------|--------------|--------------|---------|
| 1      | 9.537         | BB S | 0.2215      | 622.99792    | 45.56964     | 55.2143 |
| 2      | 10.978        | MM   | 0.2319      | 505.32892    | 36.32185     | 44.7857 |

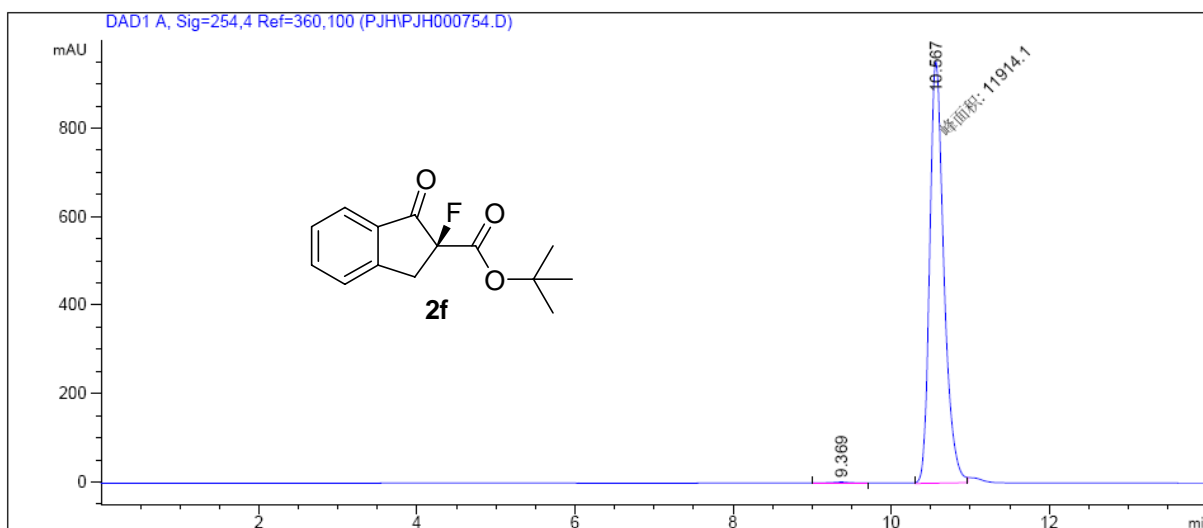

| Peak # | RetTime [min] | Type | Width [min] | Area [mAU*s] | Height [mAU] | Area %  |
|--------|---------------|------|-------------|--------------|--------------|---------|
| 1      | 9.369         | VB S | 0.1881      | 31.04338     | 2.38074      | 0.2599  |
| 2      | 10.567        | MM   | 0.2081      | 1.19141e4    | 954.03296    | 99.7401 |

### Benzyl 2-fluoro-2,3-dihydro-1-oxo-1H-indene-2-carboxylate (2g)

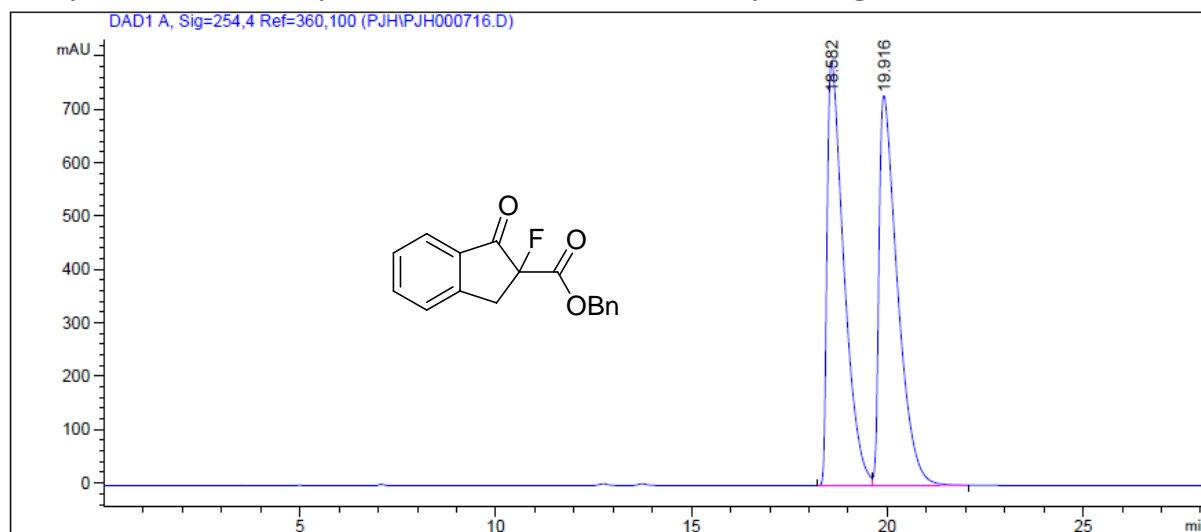

| Peak # | RetTime [min] | Type | Width [min] | Area [mAU*s] | Height [mAU] | Area %  |
|--------|---------------|------|-------------|--------------|--------------|---------|
| 1      | 18.582        | BV   | 0.4443      | 2.37227e4    | 794.61365    | 49.7510 |
| 2      | 19.916        | VB   | 0.4868      | 2.39601e4    | 730.22223    | 50.2490 |

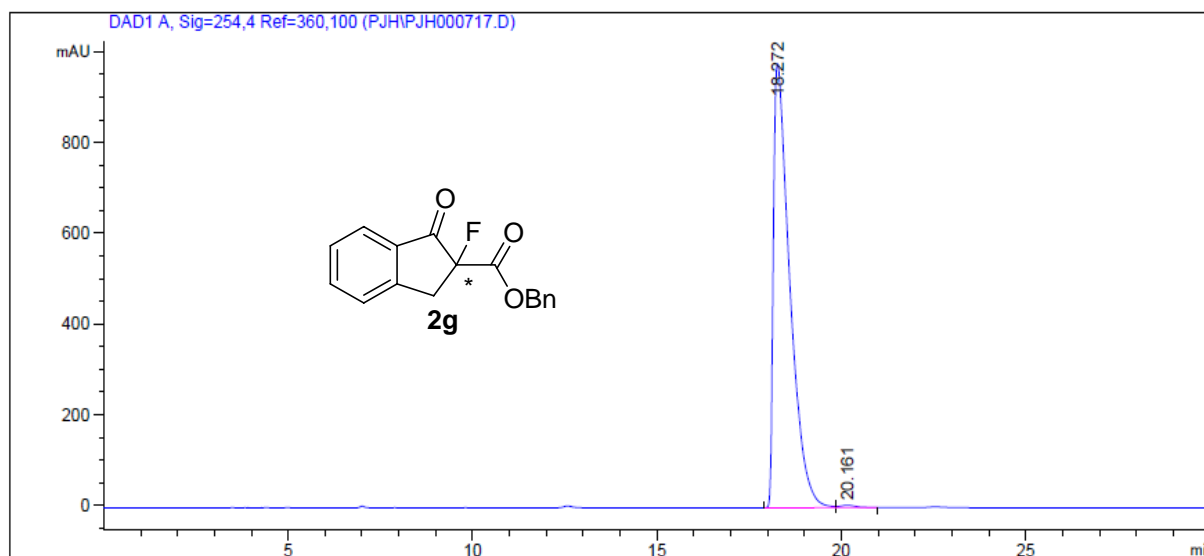

| Peak # | RetTime [min] | Type | Width [min] | Area [mAU*s] | Height [mAU] | Area %  |
|--------|---------------|------|-------------|--------------|--------------|---------|
| 1      | 18.272        | BV   | 0.4537      | 3.01580e4    | 978.25580    | 99.4684 |
| 2      | 20.161        | VB   | 0.4388      | 161.17001    | 5.39029      | 0.5316  |

### Ethyl 2-fluoro-2,3-dihydro-6-methyl-1-oxo-1H-indene-2-carboxylate (2h)

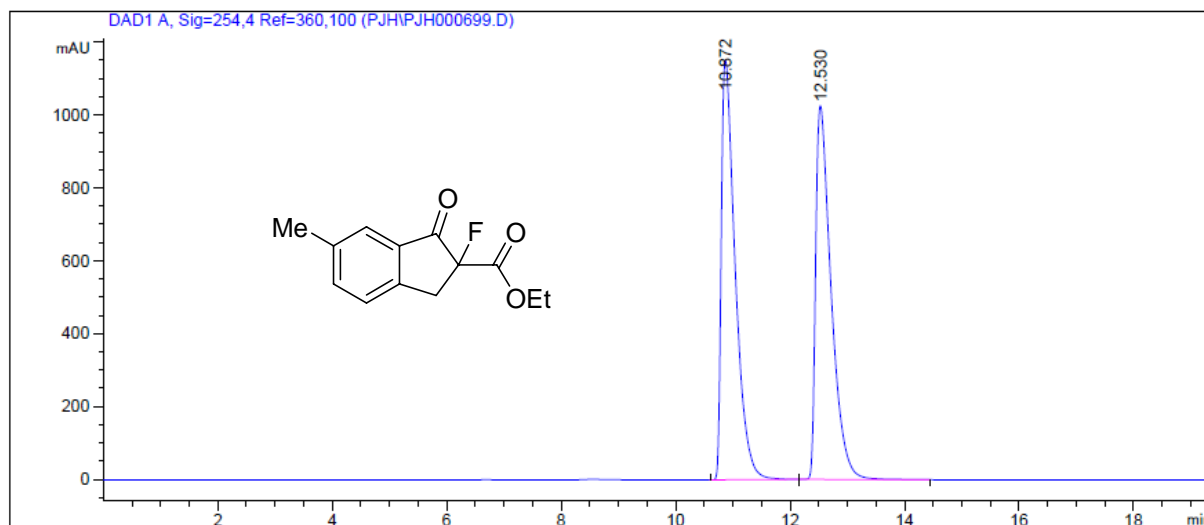

| Peak # | RetTime [min] | Type | Width [min] | Area [mAU*s] | Height [mAU] | Area %  |
|--------|---------------|------|-------------|--------------|--------------|---------|
| 1      | 10.872        | VB   | 0.2522      | 1.93643e4    | 1151.17883   | 50.2361 |
| 2      | 12.530        | BB   | 0.2782      | 1.91822e4    | 1025.84521   | 49.7639 |

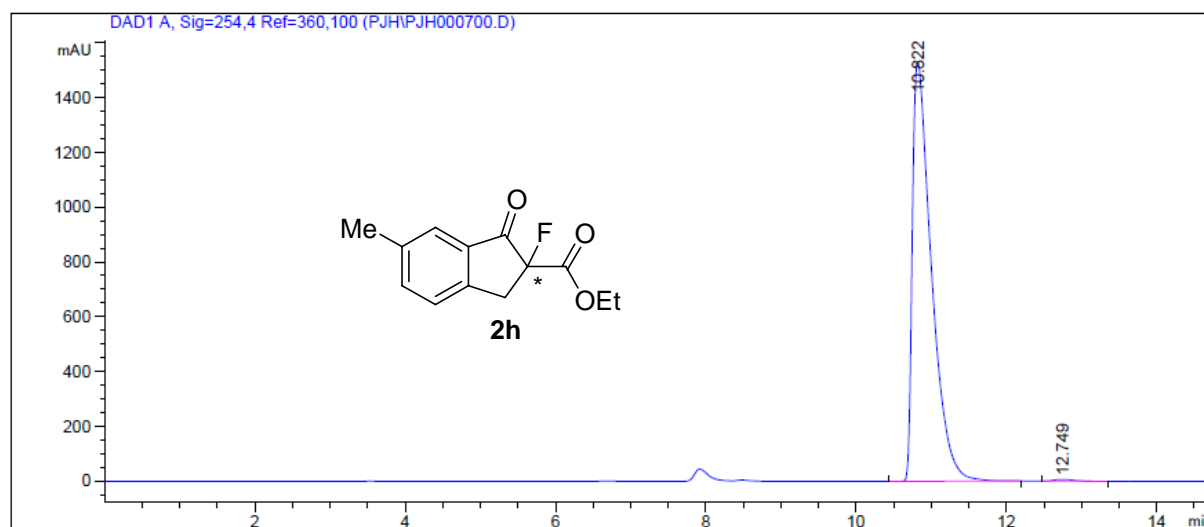

| Peak # | RetTime [min] | Type | Width [min] | Area [mAU*s] | Height [mAU] | Area %  |
|--------|---------------|------|-------------|--------------|--------------|---------|
| 1      | 10.822        | VB S | 0.2611      | 2.69321e4    | 1531.90955   | 99.6265 |
| 2      | 12.749        | BB   | 0.2431      | 100.96582    | 6.43231      | 0.3735  |



**Ethyl 2-fluoro-2,3-dihydro-5,6-dimethoxy-1-oxo-1H-indene-2-carboxylate (2i)**

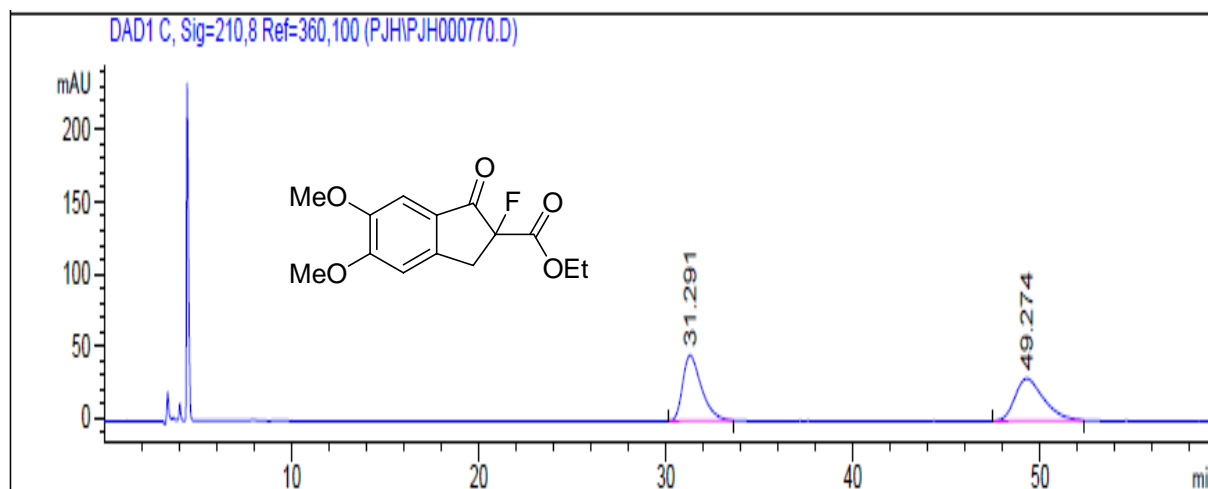

| Peak # | RetTime [min] | Type | Width [min] | Area [mAU*s] | Height [mAU] | Area %  |
|--------|---------------|------|-------------|--------------|--------------|---------|
| 1      | 31.291        | BB   | 1.0184      | 3182.94702   | 45.59554     | 50.0884 |
| 2      | 49.274        | BB   | 1.6093      | 3171.71167   | 29.38514     | 49.9116 |

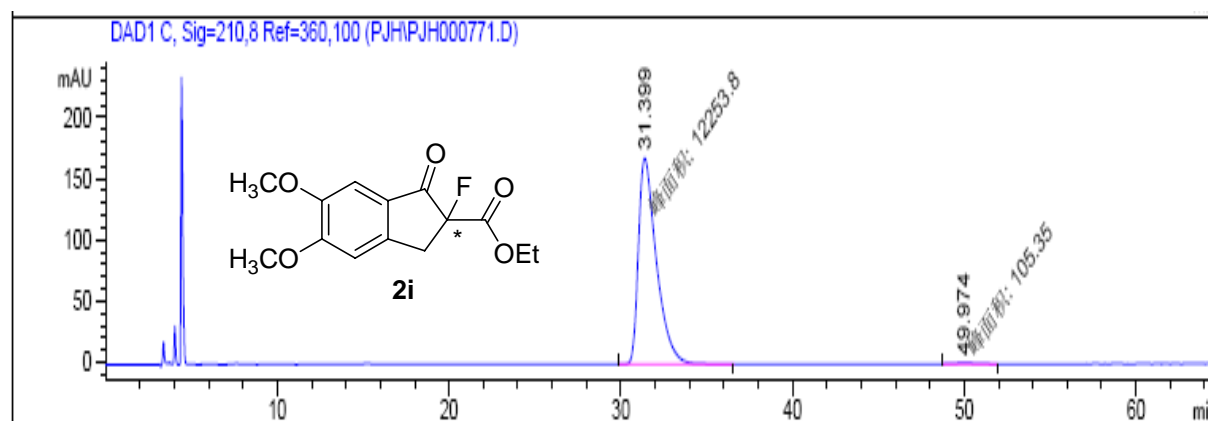

| Peak # | RetTime [min] | Type | Width [min] | Area [mAU*s] | Height [mAU] | Area %  |
|--------|---------------|------|-------------|--------------|--------------|---------|
| 1      | 31.399        | MM   | 1.2155      | 1.22538e4    | 168.01546    | 99.1476 |
| 2      | 49.974        | MM   | 1.5556      | 105.35039    | 1.12873      | 0.8524  |

### Ethyl 5-chloro-2-fluoro-2,3-dihydro-1-oxo-1H-indene-2-carboxylate (2j)

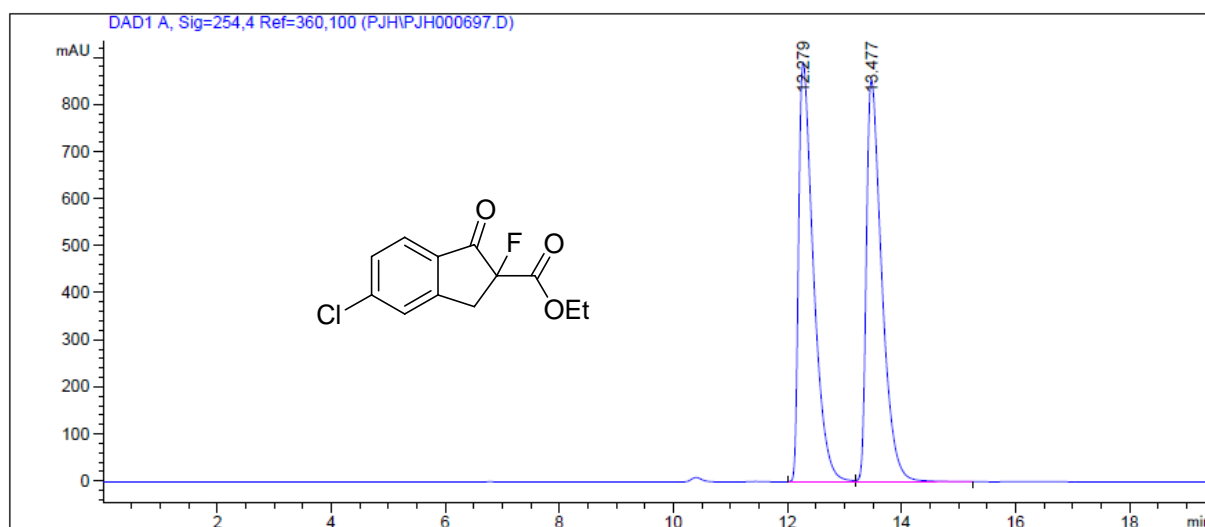

| Peak # | RetTime [min] | Type | Width [min] | Area [mAU*s] | Height [mAU] | Area %  |
|--------|---------------|------|-------------|--------------|--------------|---------|
| 1      | 12.279        | BV   | 0.2710      | 1.61208e4    | 891.30896    | 50.0317 |
| 2      | 13.477        | VB   | 0.2838      | 1.61003e4    | 854.39325    | 49.9683 |

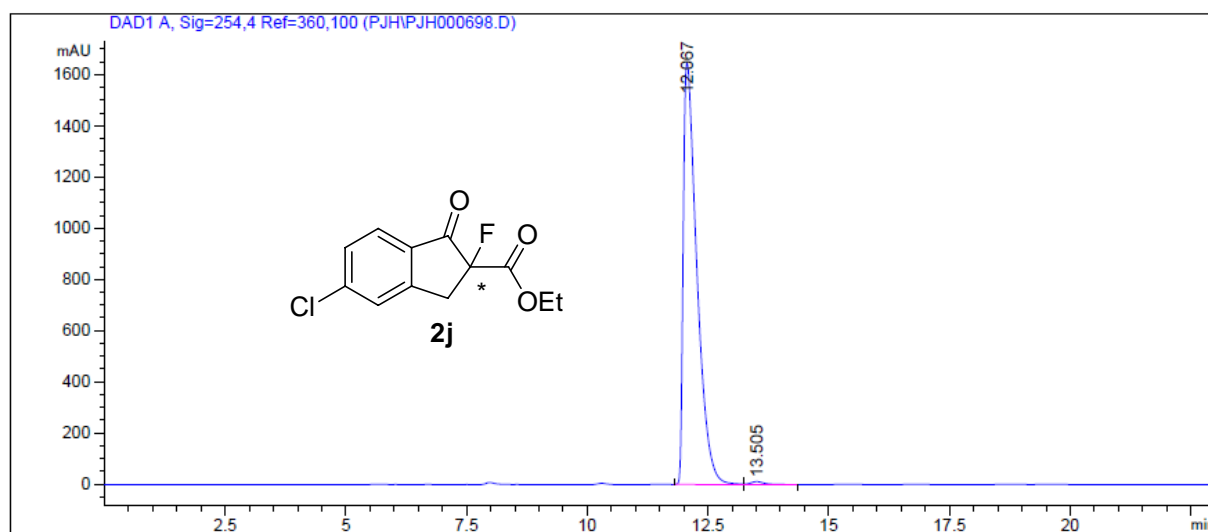

| Peak # | RetTime [min] | Type | Width [min] | Area [mAU*s] | Height [mAU] | Area %  |
|--------|---------------|------|-------------|--------------|--------------|---------|
| 1      | 12.067        | BV   | 0.2921      | 3.22049e4    | 1647.15869   | 99.2764 |
| 2      | 13.505        | VB   | 0.2956      | 234.74156    | 11.82297     | 0.7236  |

### Ethyl 5-bromo-2-fluoro-2,3-dihydro-1-oxo-1H-indene-2-carboxylate (2k)

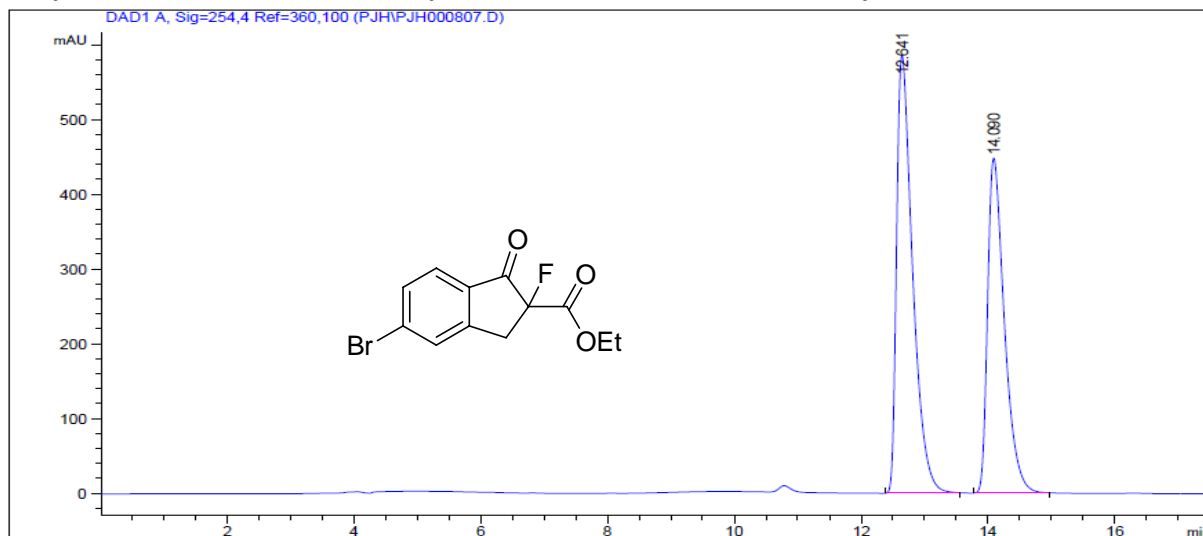

| Peak # | RetTime [min] | Type | Width [min] | Area [mAU*s] | Height [mAU] | Area %  |
|--------|---------------|------|-------------|--------------|--------------|---------|
| 1      | 12.641        | BB   | 0.2624      | 1.02674e4    | 585.96002    | 55.5121 |
| 2      | 14.090        | BB   | 0.2784      | 8228.37109   | 447.79663    | 44.4879 |

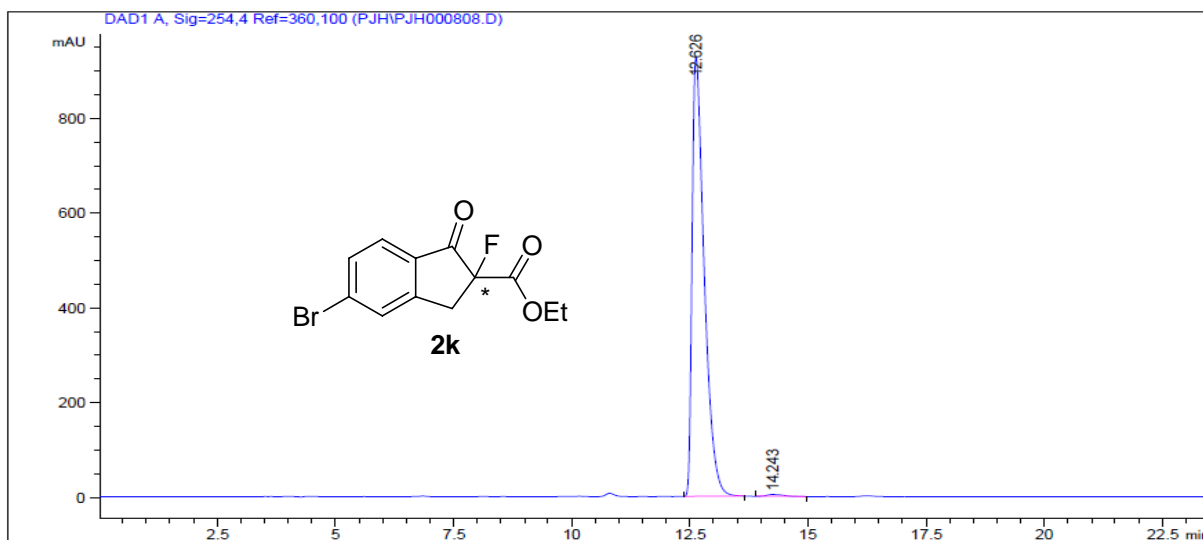

| Peak # | RetTime [min] | Type | Width [min] | Area [mAU*s] | Height [mAU] | Area %  |
|--------|---------------|------|-------------|--------------|--------------|---------|
| 1      | 12.626        | BB   | 0.2681      | 1.65446e4    | 927.36285    | 99.4095 |
| 2      | 14.243        | BB   | 0.3406      | 98.27766     | 4.08649      | 0.5905  |

### N-butyl-2-fluoro-2,3-dihydro-1-oxo-1H-indene-2-carboxamide (2l)

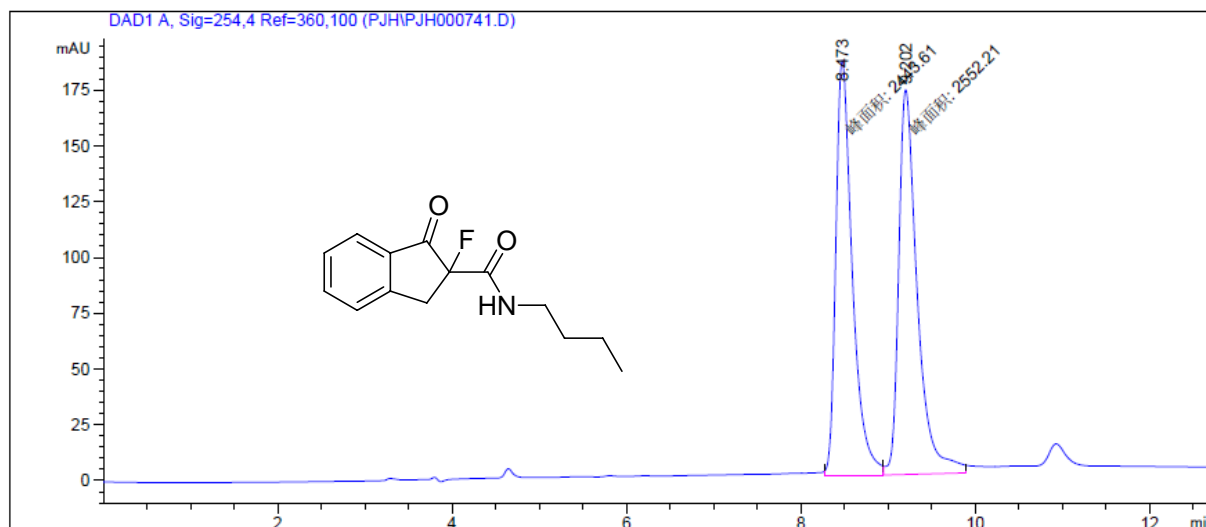

| Peak # | RetTime [min] | Type | Width [min] | Area [mAU*s] | Height [mAU] | Area %  |
|--------|---------------|------|-------------|--------------|--------------|---------|
| 1      | 8.473         | MM   | 0.2190      | 2443.60986   | 185.98207    | 48.9131 |
| 2      | 9.202         | MM   | 0.2466      | 2552.20898   | 172.52467    | 51.0869 |

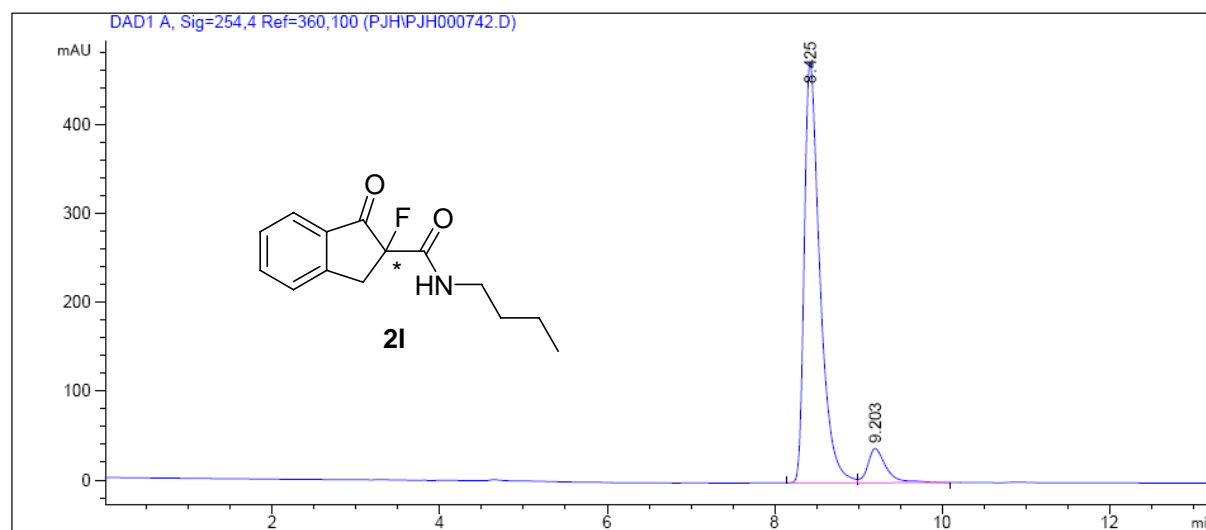

| Peak # | RetTime [min] | Type | Width [min] | Area [mAU*s] | Height [mAU] | Area %  |
|--------|---------------|------|-------------|--------------|--------------|---------|
| 1      | 8.425         | BV   | 0.1950      | 6126.85352   | 473.52057    | 91.2684 |
| 2      | 9.203         | VB S | 0.2259      | 586.15631    | 38.43771     | 8.7316  |

## 2-fluoro-2,3-dihydro-1-oxo-N-phenyl-1H-indene-2-carboxamide (2m)

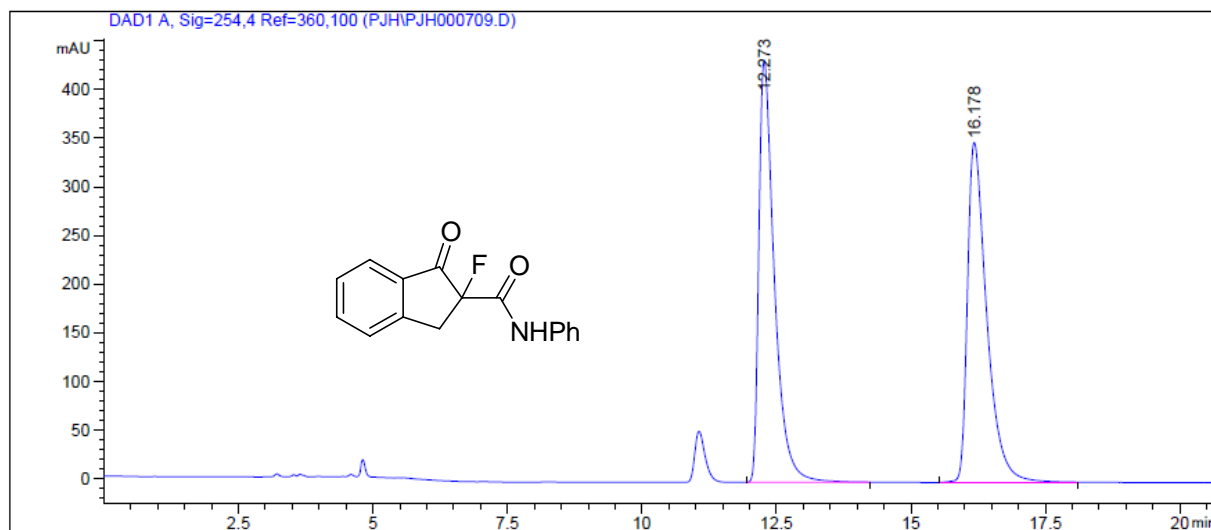

| Peak # | RetTime [min] | Type | Width [min] | Area [mAU*s] | Height [mAU] | Area %  |
|--------|---------------|------|-------------|--------------|--------------|---------|
| 1      | 12.273        | BB   | 0.2985      | 8714.30859   | 433.62891    | 50.0220 |
| 2      | 16.178        | BB   | 0.3708      | 8706.65039   | 349.25421    | 49.9780 |

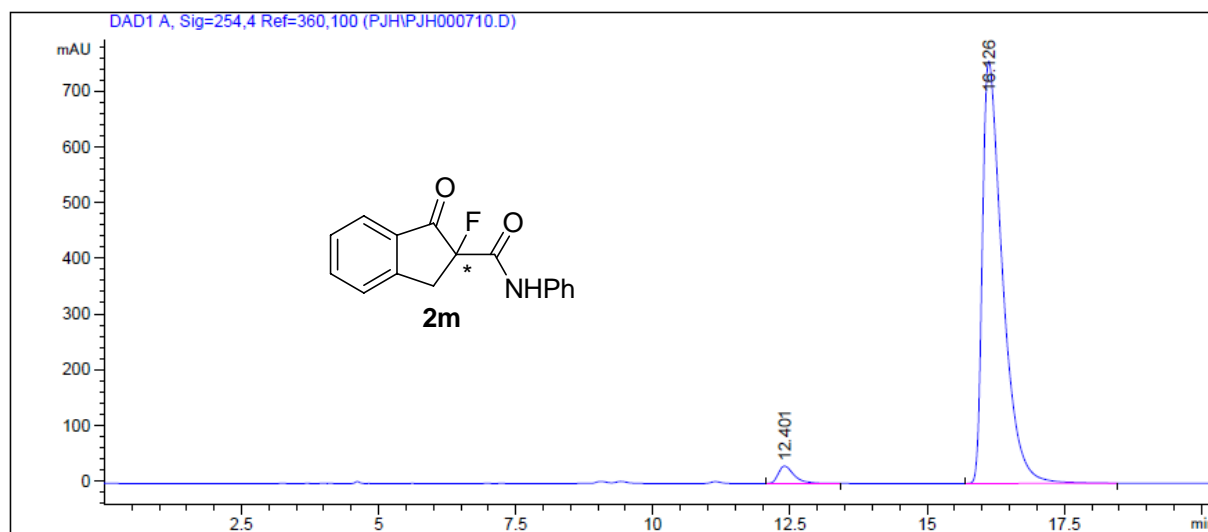

| Peak # | RetTime [min] | Type | Width [min] | Area [mAU*s] | Height [mAU] | Area %  |
|--------|---------------|------|-------------|--------------|--------------|---------|
| 1      | 12.401        | BB   | 0.2983      | 639.49115    | 31.84698     | 3.2132  |
| 2      | 16.126        | BB   | 0.3807      | 1.92628e4    | 757.56415    | 96.7868 |

### N-benzyl-2-fluoro-2,3-dihydro-1-oxo-1H-indene-2-carboxamide (2n)

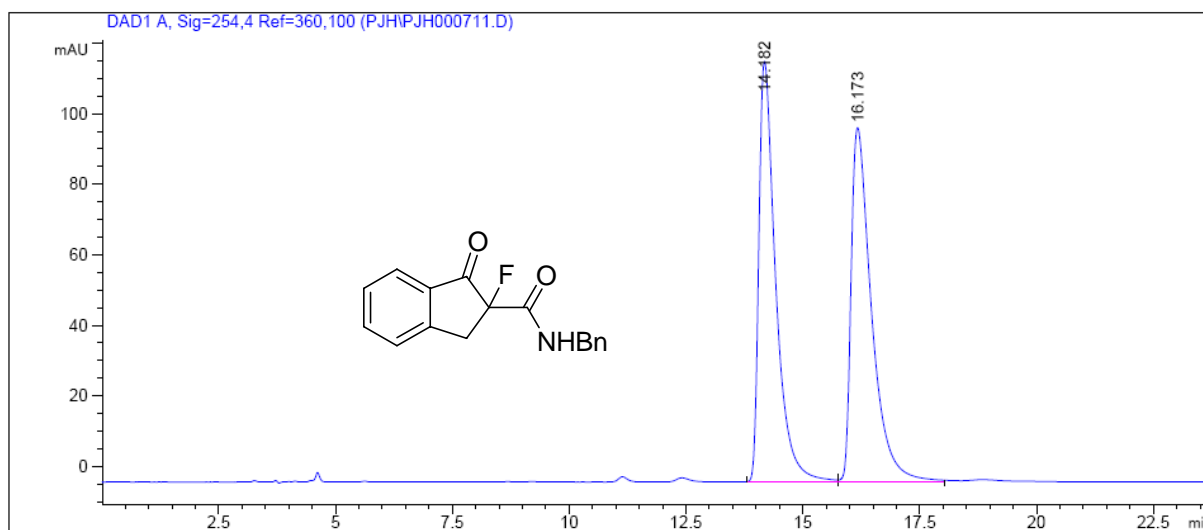

| Peak # | RetTime [min] | Type | Width [min] | Area [mAU*s] | Height [mAU] | Area %  |
|--------|---------------|------|-------------|--------------|--------------|---------|
| 1      | 14.182        | BV   | 0.3724      | 2988.03931   | 119.21655    | 49.5036 |
| 2      | 16.173        | VB   | 0.4503      | 3047.95923   | 100.37833    | 50.4964 |

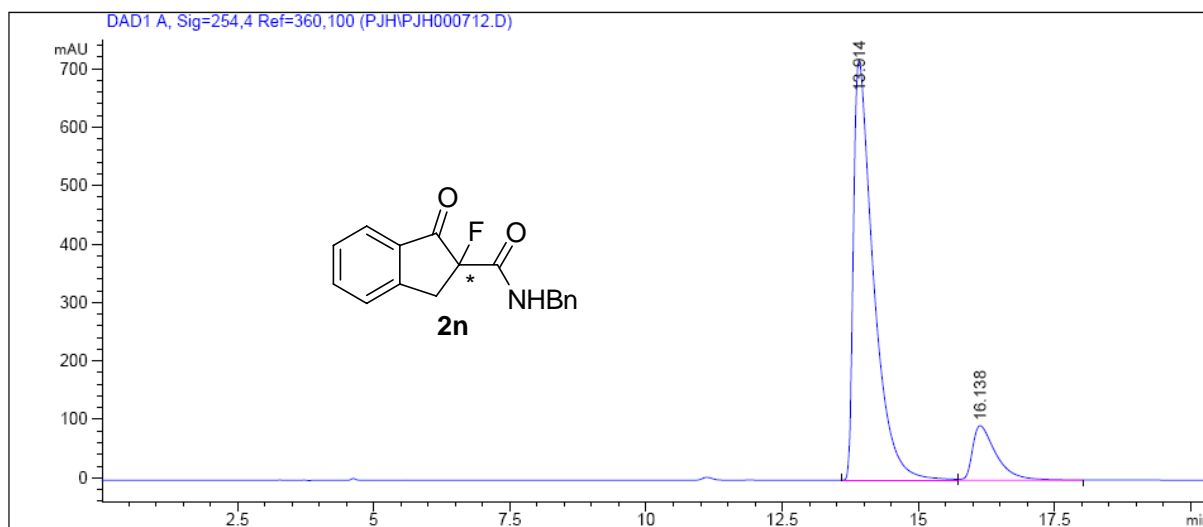

| Peak # | RetTime [min] | Type | Width [min] | Area [mAU*s] | Height [mAU] | Area %  |
|--------|---------------|------|-------------|--------------|--------------|---------|
| 1      | 13.914        | BV   | 0.3748      | 1.83714e4    | 717.40485    | 86.6498 |
| 2      | 16.138        | VB   | 0.4501      | 2830.50049   | 93.26437     | 13.3502 |
